# Supplementary material
Source: publisher figshare collection journal article supplement (https://gsajournals.figshare.com/articles/dataset/_/6015452)
Supplement: Supplementary file 1 [file 1]

## Sheet: VPS74 screen
QFA results for vps74Δ at 37°C
query strain: vps74Δ
control strain: lyp1Δ
GI: Genetic interaction (E: enhancer; S: suppressor)
GIS: Genetic interaction score
significant genetic interaction threshold: q<0.05
Query/control fitness: mean fitness (MDR x MDP) per genotype
Query SE/control SE: Calculated standart error of the mean fitness
Query count/control count: number of growth curves analysed per genotype
R package version: 0.0-44
#########################################################
ORF	Gene	P	Q	GIS	QueryFitnessSummary	ControlFitnessSummary	QuerySE	ControlSE	QueryCount	ControlCount	TestType	Type
YHR030C	SLT2	2.53377e-08	6.3027e-07	-48.5109	0	88.1468	0	3.28039	8	8	t-test	E
YDR372C	VPS74	1.01956e-06	1.52084e-05	-47.6345	0	86.5543	0	5.50517	8	8	t-test	E
YPR023C	EAF3	9.81881e-08	2.06773e-06	-41.6493	0	75.6788	0	3.42468	8	8	t-test	E
YBL047C	EDE1	1.73495e-11	2.07038e-09	-41.3024	1.03312	76.9256	0.507557	2.01585	8	8	t-test	E
YDL155W	CLB3	6.91983e-13	1.23865e-10	-41.097	1.77066	77.8926	1.2247	2.04244	8	8	t-test	E
YAL002W	VPS8	1.57034e-05	0.000165348	-40.2026	0.479767	73.9219	0.479767	7.13388	8	8	t-test	E
YDR373W	FRQ1	4.32538e-11	2.5686e-09	-38.8955	2.69924	75.5797	1.32537	1.32405	8	8	t-test	E
YJR035W	RAD26	1.64421e-07	3.09803e-06	-37.9578	0.433265	69.7584	0.433265	3.75576	8	8	t-test	E
YDR440W	DOT1	3.77024e-11	2.5686e-09	-37.3733	0.436163	68.7016	0.436163	1.86299	8	8	t-test	E
YJL095W	BCK1	1.3891e-05	0.000153514	-37.1792	3.82344	74.5039	3.82344	1.81841	8	8	t-test	E
YDR057W	YOS9	3.08091e-10	1.18467e-08	-36.6366	0.61098	67.6806	0.61098	2.41401	8	8	t-test	E
YIL084C	SDS3	2.18069e-07	3.90343e-06	-33.676	3.30348	67.1935	2.70556	3.22767	8	8	t-test	E
YMR307W	GAS1	2.61623e-07	4.46005e-06	-32.4133	1.24952	61.167	1.24952	4.48505	8	8	t-test	E
YMR106C	YKU80	0.00626696	0.0190133	-30.2265	21.89	94.6981	7.96678	5.11004	8	8	t-test	E
YLR087C	CSF1	4.37284e-06	5.59099e-05	-29.1135	0.23869	53.3344	0.23869	4.25222	8	8	t-test	E
YJL115W	ASF1	1.56527e-07	3.09803e-06	-26.3743	2.12157	51.7784	1.28905	3.70703	8	8	t-test	E
YDR371W	CTS2	0.0138927	0.0338903	-25.8268	12.1224	68.9554	7.9387	1.78652	8	8	t-test	E
YDL074C	BRE1	0.000206549	0.00126885	-25.4161	5.23671	55.6976	4.06472	3.26132	8	16	t-test	E
YNL325C	FIG4	0.0045912	0.0153691	-25.3055	13.1651	69.9029	6.22212	1.79223	8	8	t-test	E
YBL051C	PIN4	0.0011074	0.0049556	-24.3817	15.8783	73.1545	4.76424	2.47337	8	8	t-test	E
YGL168W	HUR1	3.46053e-05	0.000302163	-23.5145	0.672984	43.9499	0.461216	4.78416	8	8	t-test	E
YIL132C	CSM2	3.16725e-05	0.000290737	-23.4123	4.30532	50.3642	2.82324	1.81746	8	8	t-test	E
YAR003W	SWD1	0.0018192	0.00723638	-23.3816	15.9723	71.5079	4.54243	7.33689	8	8	t-test	E
YBR082C	UBC4	0.00131503	0.00567207	-23.3563	15.3213	70.2791	4.70887	2.54284	8	16	t-test	E
YMR119W	ASI1	0.0328182	0.0628285	-22.7762	20.8652	79.2984	8.58103	2.02285	8	16	t-test	E
YHR077C	NMD2	5.02241e-11	2.5686e-09	-22.5951	19.898	77.2119	2.65382	1.67761	48	56	t-test	E
YPR135W	CTF4	6.41575e-05	0.000487103	-21.8283	0	39.6631	0	4.69377	8	8	t-test	E
YCR088W	ABP1	0.00459356	0.0153691	-21.0912	12.055	60.2283	5.17605	1.24676	8	8	t-test	E
YBR289W	SNF5	0.013025	0.0328376	-21.0069	0	38.1705	0	11.5482	8	8	t-test	E
YJL030W	MAD2	0.0105303	0.0279249	-20.8618	0	37.9069	0	10.9519	8	8	t-test	E
YDL109C	YDL109C	2.6408e-08	6.3027e-07	-20.829	18.2794	71.0618	3.08968	1.54229	48	56	t-test	E
YDL042C	SIR2	0.0178557	0.0412409	-20.0996	0	36.522	0	11.864	8	8	t-test	E
YEL062W	NPR2	0.013433	0.0336296	-19.0033	22.0006	74.5061	5.80639	3.44324	8	8	t-test	E
YBR272C	HSM3	0.0181088	0.0412927	-18.8674	16.0001	63.356	6.15531	1.49773	8	8	t-test	E
YOR027W	STI1	0.0382859	0.0700253	-18.7586	19.9717	70.3748	7.3616	1.31276	8	8	t-test	E
YLR015W	BRE2	0.00807821	0.0233226	-18.218	23.1367	75.1434	5.01458	3.95634	8	8	t-test	E
YHR012W	VPS29	0.00376611	0.0129641	-17.7807	11.8547	53.8491	4.27742	2.54937	8	8	t-test	E
YNL250W	RAD50	3.80997e-11	2.5686e-09	-17.421	14.4289	57.8729	1.95305	2.03758	48	48	t-test	E
YDR369C	XRS2	0.0455258	0.0814913	-17.031	17.9057	63.4815	6.97147	2.9332	8	8	t-test	E
YLR373C	VID22	0.0145509	0.0349611	-16.497	21.9228	69.8107	5.11862	3.26981	8	8	t-test	E
YOR109W	INP53	0.0524264	0.0917207	-16.3589	19.1767	64.5699	7.00773	1.13657	8	8	t-test	E
YLR320W	MMS22	0.00318501	0.0111788	-16.2882	11.3054	50.139	3.71336	4.42549	8	8	t-test	E
YJL154C	VPS35	0.017715	0.0411817	-16.1647	14.4451	55.6194	5.24435	2.73824	8	8	t-test	E
YDR363W-A	SEM1	0.00540617	0.0169773	-15.9661	20.2905	65.8801	4.06626	3.75853	8	8	t-test	E
YNL051W	COG5	0.0399384	0.0722119	-15.5858	16.1789	57.718	6.15427	2.74981	8	8	t-test	E
YML032C	RAD52	4.07197e-09	1.21481e-07	-14.8292	16.9729	57.7861	1.94816	1.95032	48	56	t-test	E
YLL002W	RTT109	0.00602827	0.0186045	-14.3383	15.6554	54.5	3.75279	2.47892	8	8	t-test	E
YIL128W	MET18	0.0162019	0.0381598	-14.2718	0.171043	26.2433	0.171043	8.2394	8	8	t-test	E
YKL113C	RAD27	0.0210736	0.0462844	-13.909	19.6249	60.9326	4.51249	4.59681	8	8	t-test	E
YNL215W	IES2	0.0363673	0.0677194	-13.0469	0	23.7069	0	9.18169	8	8	t-test	E
YKL213C	DOA1	0.0106755	0.0281016	-12.6993	3.67807	29.7586	3.41833	4.61991	8	8	t-test	E
YML028W	TSA1	0.00032913	0.00185599	-12.1005	19.7826	57.9333	2.93413	2.25897	48	56	t-test	E
YJL053W	PEP8	0.0906316	0.145498	-11.8536	15.9637	50.5455	6.01445	1.71739	8	8	t-test	E
YNL106C	INP52	0.0138668	0.0338903	-11.6966	0.807913	22.7213	0.421997	6.52928	8	8	t-test	E
YNL201C	PSY2	0.01835	0.0415779	-11.5613	29.533	74.6703	3.7796	1.99311	8	8	t-test	E
YNL307C	MCK1	0.0676334	0.112096	-11.5437	25.1534	66.6806	5.32449	1.52941	8	8	t-test	E
YMR078C	CTF18	0.0639774	0.108549	-11.4157	22.219	61.1158	5.12847	2.58298	8	8	t-test	E
YGL127C	SOH1	0.0264069	0.0552845	-11.0413	1.02287	21.9212	0.515852	7.15676	8	8	t-test	E
YLR268W	SEC22	0.0721162	0.117889	-10.9542	18.1153	52.8206	4.90853	4.33053	8	8	t-test	E
YNL082W	PMS1	0.00730063	0.0217802	-9.6113	39.9868	90.1222	2.14903	3.97167	8	8	t-test	E
YDR269C	YDR269C	5.981e-09	1.64707e-07	-9.25183	30.2772	71.8262	1.21291	1.33257	48	56	t-test	E
YMR284W	YKU70	0.337706	0.431781	-9.06949	24.1187	60.3046	8.7939	1.27192	8	8	t-test	E
YNR059W	MNT4	8.90835e-17	3.18919e-14	-8.85137	32.8787	75.8255	0.527007	1.27962	48	56	t-test	E
YMR048W	CSM3	0.00466302	0.015457	-8.73892	39.6493	87.9238	1.91954	3.17602	8	8	t-test	E
YNL154C	YCK2	0.000127907	0.000817691	-8.5482	36.3518	81.5855	1.2946	1.53059	8	8	t-test	E
YKL032C	IXR1	0.128967	0.194811	-8.48698	26.8636	64.2338	4.87045	1.98862	8	8	t-test	E
YBR288C	APM3	0.0284006	0.0576033	-8.18275	33.1412	75.0876	2.94793	1.775	8	8	t-test	E
YFL031W	HAC1	0.362347	0.456761	-8.15372	24.9905	60.2246	8.35828	0.880237	8	8	t-test	E
YHL002W	HSE1	0.168701	0.243041	-7.8651	33.264	74.7336	4.90274	3.45172	8	8	t-test	E
YHR079C	IRE1	0.375816	0.472078	-7.71102	24.3315	58.2229	8.02854	3.00493	8	8	t-test	E
YDR225W	HTA1	0.279793	0.375153	-7.60739	28.0394	64.772	6.25217	3.80158	8	8	t-test	E
YJL187C	SWE1	0.0693413	0.113872	-7.4652	35.4733	78.0213	3.3286	2.77556	8	8	t-test	E
YEL064C	AVT2	0.566268	0.662497	-6.94715	24.6994	57.5033	9.54107	12.6142	8	8	t-test	E
YJL024C	APS3	0.346623	0.440039	-6.92089	36.6592	79.1872	6.80157	1.90961	8	8	t-test	E
YER028C	MIG3	0.0372167	0.0686783	-6.46792	47.549	98.1513	1.29631	4.35043	8	8	t-test	E
YNL107W	YAF9	0.103233	0.162808	-5.97011	38.5689	80.9295	3.06838	2.19538	8	8	t-test	E
YGR100W	MDR1	0.0316274	0.0612032	-5.64081	39.8644	82.6853	1.8868	2.51269	8	8	t-test	E
YDR004W	RAD57	0.0339962	0.064056	-5.36147	32.7075	69.1732	1.58547	2.98149	8	8	t-test	E
YOR382W	FIT2	0.000113396	0.000738104	-4.98625	35.0476	72.7435	1.05827	1.12253	48	56	t-test	E
YHR154W	RTT107	0.175728	0.25064	-4.95743	45.4841	91.6547	2.70552	3.93992	8	8	t-test	E
YNL087W	TCB2	0.101592	0.160929	-4.84663	0	8.80657	0	4.67481	8	8	t-test	E
YGL213C	SKI8	0.394954	0.489251	-4.73522	27.6911	58.9203	5.18007	1.44301	8	8	t-test	E
YNL085W	MKT1	0.181601	0.254867	-4.71134	39.5305	80.3897	3.08591	1.75311	8	8	t-test	E
YDL236W	PHO13	0.168476	0.243041	-4.70802	41.9429	84.767	2.8881	2.34486	8	8	t-test	E
YOL095C	HMI1	0.394935	0.489251	-4.6834	26.8296	57.2607	5.03769	2.40352	8	8	t-test	E
YBR009C	HHF1	0.137543	0.206027	-4.64628	35.9427	73.7522	1.98426	3.96198	8	8	t-test	E
YEL037C	RAD23	0.429803	0.521591	-4.49467	36.3339	74.1875	5.28919	1.86018	8	8	t-test	E
YDR034C	LYS14	0.103932	0.163192	-4.28708	3.96454	14.9936	1.28938	4.12015	48	56	t-test	E
YHR135C	YCK1	0.161305	0.237481	-4.2547	42.6083	85.1523	1.41708	4.46503	8	8	t-test	E
YLR032W	RAD5	0.334831	0.431185	-4.23517	38.5255	77.6982	2.77262	5.82168	8	8	t-test	E
YNL218W	MGS1	0.0286481	0.0576182	-4.22804	46.4146	92.0202	1.46367	1.50372	8	8	t-test	E
YHL019C	APM2	0.342528	0.436388	-4.21463	41.4807	83.0306	3.39861	4.72534	8	8	t-test	E
YNL268W	LYP1	0.215443	0.297793	-4.02466	5.477	17.265	2.5029	3.70178	48	56	t-test	E
YDR496C	PUF6	0.0308745	0.0603934	-3.3471	29.0166	58.8065	1.3819	1.13832	48	56	t-test	E
YOL071W	EMI5	0.162522	0.237481	-3.34667	37.6352	74.466	2.23753	1.39609	48	56	t-test	E
YAL014C	SYN8	0.323397	0.419478	-3.31855	41.9673	82.2866	2.18275	4.35344	8	8	t-test	E
YBR175W	SWD3	0.623844	0.718123	-3.22496	21.1612	44.3108	4.86138	7.64223	8	8	t-test	E
YGL087C	MMS2	0.172774	0.247412	-3.08312	43.3656	84.3996	1.56153	2.67364	8	8	t-test	E
YHR031C	RRM3	0.470756	0.567443	-2.94205	36.484	71.6391	3.62924	2.65103	8	8	t-test	E
YDR072C	IPT1	0.594982	0.689332	-2.77188	33.2484	65.4507	4.89731	1.78865	8	8	t-test	E
YDR386W	MUS81	0.568516	0.66296	-2.53651	42.5314	81.8907	2.73565	6.1198	8	8	t-test	E
YBL088C	TEL1	0.470283	0.567443	-2.4941	46.3069	88.6739	1.89919	5.012	8	8	t-test	E
YNL246W	VPS75	0.704496	0.783259	-2.42192	27.8356	54.9794	6.10377	1.10517	8	8	t-test	E
YOR191W	RIS1	0.725904	0.797159	-2.31472	37.6963	72.702	6.08848	3.4901	8	8	t-test	E
YJL094C	KHA1	0.316746	0.416326	-2.27836	34.7602	67.301	2.22017	0.694388	48	56	t-test	E
YBR106W	PHO88	0.775795	0.846752	-2.12516	17.1948	35.1053	5.86842	7.91094	8	8	t-test	E
YLR262C	YPT6	0.107189	0.16757	-1.77359	0	3.22271	0	1.74454	8	8	t-test	E
YDR414C	ERD1	0.489312	0.585866	-1.72322	37.7195	71.6694	2.01395	2.428	8	8	t-test	E
YIR002C	MPH1	0.650857	0.744431	-1.5972	40.007	75.5968	2.37561	4.55463	8	8	t-test	E
YNL136W	EAF7	0.836047	0.898813	-1.50346	19.0729	37.3882	6.89109	2.40645	8	8	t-test	E
YLR039C	RIC1	0.00303926	0.0107728	-1.47183	0.0491567	2.7637	0.0491567	0.608394	8	8	t-test	E
YJR082C	EAF6	0.854697	0.905271	-1.41463	37.9967	71.6123	7.35768	2.23348	8	8	t-test	E
YOL013C	HRD1	0.682738	0.771041	-1.32408	40.1022	75.2735	2.90106	2.1793	8	8	t-test	E
YLR394W	CST9	0.722222	0.795555	-1.26717	41.3864	77.5035	2.59949	4.23834	8	8	t-test	E
YER142C	MAG1	0.713141	0.787977	-1.25465	43.5051	81.3306	2.97793	2.66177	8	8	t-test	E
YKL076C	PSY1	0.884603	0.928703	-1.20172	34.9244	65.643	7.84835	2.86964	8	8	t-test	E
YJR090C	GRR1	0.00689076	0.0207302	-1.09083	0	1.98209	0	0.52434	8	8	t-test	E
YDR227W	SIR4	0.0309026	0.0603934	-1.05293	0	1.91323	0	0.710161	8	8	t-test	E
YDL065C	PEX19	0.848158	0.903692	-1.00215	49.2473	91.3058	4.73599	3.3747	8	8	t-test	E
YKL139W	CTK1	0.907919	0.934008	-0.86717	9.28844	18.4532	4.77379	10.1778	8	8	t-test	E
YAL015C	NTG1	0.709814	0.786729	-0.828626	47.682	88.1461	1.77388	2.29353	8	8	t-test	E
YGR261C	APL6	0.918058	0.934163	-0.823698	37.6501	69.9087	7.61846	2.48292	8	8	t-test	E
YBR098W	MMS4	0.803553	0.874383	-0.803317	39.0122	72.3467	2.61381	3.22854	8	8	t-test	E
YKL212W	SAC1	0.895321	0.934008	-0.790842	5.01521	10.5499	5.01521	5.57871	8	8	t-test	E
YBL079W	NUP170	0.927917	0.94106	-0.662304	29.619	55.0225	6.96154	2.33235	8	8	t-test	E
YLL019C	KNS1	0.589871	0.685629	-0.655139	38.4485	71.0532	0.913984	1.44465	48	56	t-test	E
YLR357W	RSC2	0.055244	0.0950833	-0.56937	0	1.03457	0	0.450424	8	8	t-test	E
YIL076W	SEC28	0.119254	0.183093	-0.549193	0	0.997911	0	0.56237	8	8	t-test	E
YMR224C	MRE11	0.00078322	0.00373857	-0.546233	0.081592	1.14079	0.0681733	0.25561	48	56	t-test	E
YBL003C	HTA2	0.820125	0.889711	-0.523063	49.5782	91.0365	1.20962	3.44725	8	8	t-test	E
YER019C-A	SBH2	0.899559	0.934008	-0.404563	42.0428	77.129	3.01092	1.36857	8	8	t-test	E
YER095W	RAD51	0.913485	0.934163	-0.361766	34.53	63.4	3.07632	1.79841	8	8	t-test	E
YMR186W	HSC82	0.86517	0.913661	-0.356502	39.1954	71.8678	1.7673	1.89679	8	8	t-test	E
YLR376C	PSY3	0.90541	0.934008	-0.352031	46.5633	85.2474	2.47532	2.73932	8	8	t-test	E
YMR105C	PGM2	0.841011	0.900328	-0.332208	42.1556	77.2023	1.48065	1.3224	48	56	t-test	E
YPL127C	HHO1	0.897683	0.934008	-0.325704	38.2763	70.1417	2.3267	1.44819	8	8	t-test	E
YDR358W	GGA1	0.209005	0.291144	-0.318334	0	0.578429	0	0.418073	8	8	t-test	E
YBR223C	TDP1	0.88233	0.928703	-0.31594	44.7313	81.8531	1.54649	2.56963	8	8	t-test	E
YMR137C	PSO2	0.918387	0.934163	-0.285035	42.6325	77.9833	2.42456	2.21865	8	8	t-test	E
YLR318W	EST2	0.124343	0.188621	-0.238462	0	0.433297	0	0.248186	8	8	t-test	E
YNL293W	MSB3	0.94626	0.956806	-0.223872	40.2062	73.4634	3.0003	2.18339	8	8	t-test	E
YOR141C	ARP8	0.688154	0.771161	-0.125126	0.174259	0.543998	0.174259	0.453899	8	8	t-test	E
YLR233C	EST1	0.97381	0.979281	-0.0578893	41.5566	75.6157	1.60712	1.28824	48	56	t-test	E
YPL232W	SSO1	0.986027	0.988789	-0.0512649	37.1396	67.5776	2.58126	2.21572	8	8	t-test	E
YNR006W	VPS27	0.995517	0.995517	0.00266254	0.382039	0.689345	0.283407	0.669764	8	8	t-test	S
YPR119W	CLB2	0.948788	0.956806	0.103064	42.3696	76.8003	1.31511	1.65571	48	56	t-test	S
YKL198C	PTK1	0.906614	0.934008	0.1275	45.8555	83.09	0.749302	1.42375	48	56	t-test	S
YHL006C	SHU1	0.918507	0.934163	0.247162	41.6526	75.2357	2.05603	2.10948	8	8	t-test	S
YBR114W	RAD16	0.900937	0.934008	0.314064	43.3829	78.2582	2.10754	2.33473	8	8	t-test	S
YGL217C	YGL217C	0.842485	0.900328	0.415685	41.3267	74.3373	1.90366	1.53887	48	56	t-test	S
YBR010W	HHT1	0.851761	0.904839	0.482529	39.6501	71.1694	2.28401	1.91401	8	8	t-test	S
YCR032W	BPH1	0.834968	0.898813	0.542738	37.3335	66.8506	2.38739	1.51031	8	8	t-test	S
YDR395W	SXM1	0.828046	0.89559	0.573786	39.2948	70.3579	2.38076	1.74773	8	8	t-test	S
YMR169C	ALD3	0.656574	0.746202	0.715541	44.467	79.4985	1.34392	1.58904	48	56	t-test	S
YPL164C	MLH3	0.69906	0.779637	1.08487	42.8547	75.8979	2.22352	2.92013	8	8	t-test	S
YDL040C	NAT1	0.408521	0.502579	1.20171	43.491	76.8417	1.31694	1.07919	48	56	t-test	S
YGL179C	TOS3	0.296193	0.394189	1.38399	43.4173	76.3766	1.15338	1.14945	48	56	t-test	S
YKR056W	TRM2	0.688083	0.771161	1.4959	45.9997	80.8656	3.26738	2.82878	8	8	t-test	S
YGL058W	RAD6	0.566063	0.662497	1.57284	46.6841	81.9694	2.23873	2.62764	8	8	t-test	S
YEL063C	CAN1	0.488585	0.585866	1.5943	2.16664	1.03997	2.16664	0.518134	8	8	t-test	S
YIL153W	RRD1	0.602935	0.696293	1.60408	29.6018	50.8732	2.77514	1.95538	8	8	t-test	S
YGR231C	PHB2	0.32162	0.418691	1.62298	40.4689	70.5849	1.4876	1.1882	48	56	t-test	S
YDR411C	DFM1	0.557231	0.656213	1.72317	53.0934	93.3423	2.05158	3.63518	8	8	t-test	S
YDL200C	MGT1	0.549379	0.65125	1.75698	47.8032	83.6682	2.51134	2.41592	8	8	t-test	S
YDL154W	MSH5	0.689306	0.771161	1.84702	48.3762	84.5458	3.77909	4.47062	8	8	t-test	S
YDR076W	RAD55	0.37963	0.475201	1.89506	36.3456	62.5983	1.5799	2.47883	8	8	t-test	S
YBL037W	APL3	0.179642	0.254196	2.24903	48.7348	84.4669	1.15634	1.98817	8	8	t-test	S
YDR310C	SUM1	0.681796	0.771041	2.30238	35.8083	60.882	5.33887	1.39132	8	8	t-test	S
YPL096W	PNG1	0.120939	0.184239	2.30348	45.058	77.687	1.27261	1.33225	48	56	t-test	S
YJR154W	YJR154W	0.0652075	0.110115	2.32038	45.2724	78.0459	0.926117	1.5103	48	56	t-test	S
YBR275C	RIF1	0.24962	0.338499	2.34828	42.059	72.1563	1.84302	0.715699	8	8	t-test	S
YBL091C-A	SCS22	0.317478	0.416326	2.43855	40.7101	69.5413	2.09354	1.80679	8	8	t-test	S
YMR176W	ECM5	0.0506039	0.0892423	2.51558	46.0406	79.0872	1.02833	1.35208	48	56	t-test	S
YLR151C	PCD1	0.243912	0.332017	2.55609	47.4271	81.5328	1.79819	1.89385	8	8	t-test	S
YBR274W	CHK1	0.00353269	0.0122787	2.63948	43.2466	73.7851	0.738176	0.866121	48	56	t-test	S
YOR106W	VAM3	0.654063	0.745715	2.75647	12.6481	17.9736	4.81277	6.53964	8	8	t-test	S
YDL234C	GYP7	0.307096	0.407001	2.79395	50.7551	87.1478	2.11563	2.82982	8	8	t-test	S
YMR039C	SUB1	0.749699	0.820772	2.80686	38.3947	64.6648	8.42911	1.37184	8	8	t-test	S
YOL090W	MSH2	0.518129	0.616247	2.85828	39.9254	67.3528	4.16868	1.0601	8	8	t-test	S
YLR436C	ECM30	0.643999	0.738948	2.86347	44.2847	75.2643	5.91336	0.926396	8	8	t-test	S
YOR202W	HIS3	0.0188074	0.0420816	2.90479	43.2865	73.3756	0.992022	1.31205	112	144	t-test	S
YKL175W	ZRT3	0.0461066	0.0821202	2.95453	40.769	68.7107	1.18569	1.54941	48	56	t-test	S
YMR173W	DDR48	0.210756	0.292444	3.13235	42.2261	71.0353	2.07575	2.01205	8	8	t-test	S
YER089C	PTC2	0.405901	0.501078	3.18164	52.1645	89.0043	2.24776	5.35109	8	8	t-test	S
YNL304W	YPT11	0.0270956	0.0560707	3.38516	42.7911	71.6025	1.1986	0.848146	8	8	t-test	S
YPL121C	MEI5	0.319978	0.418073	3.39223	43.4269	72.745	2.9621	2.36071	8	8	t-test	S
YCL016C	DCC1	0.166561	0.242394	3.41199	35.3526	58.0377	1.36162	3.42542	8	8	t-test	S
YCL061C	MRC1	0.0893897	0.144151	3.50497	35.4548	58.0544	1.62112	1.75983	8	8	t-test	S
YIR039C	YPS6	0.000457963	0.0023761	3.55845	45.3882	76.0067	0.673528	1.29983	48	56	t-test	S
YLR410W	VIP1	0.336262	0.431476	3.59417	39.3024	64.8836	3.40262	1.57041	8	8	t-test	S
YDR217C	RAD9	0.0284798	0.0576033	3.59967	43.2134	71.9801	1.46285	1.20959	48	56	t-test	S
YLR387C	REH1	0.0489376	0.086731	3.63642	45.8038	76.6202	1.31987	2.28832	48	56	t-test	S
YCR092C	MSH3	0.169042	0.243041	3.65678	43.2007	71.8532	2.12744	2.36163	8	8	t-test	S
YMR206W	YMR206W	0.00299003	0.0107043	3.70982	45.4312	75.8098	0.90461	1.48372	48	56	t-test	S
YOR279C	RFM1	0.27026	0.363734	3.73093	50.0315	84.1304	2.85512	2.64221	8	8	t-test	S
YNL031C	HHT2	0.181303	0.254867	3.74864	42.116	69.7155	2.43453	1.54997	8	8	t-test	S
YKL164C	PIR1	0.0664682	0.111194	3.75656	46.2081	77.1365	1.49522	2.05857	8	8	t-test	S
YER116C	SLX8	0.514934	0.614488	3.91122	28.25	44.2247	5.61561	2.02859	8	8	t-test	S
YDL226C	GCS1	0.232962	0.318322	3.94309	4.02516	0.149135	3.01946	0.149135	8	8	t-test	S
YCR014C	POL4	0.229881	0.315316	3.99987	45.1443	74.7615	2.88719	2.10136	8	8	t-test	S
YHR108W	GGA2	0.177305	0.251885	4.03503	38.8731	63.3025	2.57926	1.75924	8	8	t-test	S
YBR228W	SLX1	0.0335337	0.0635189	4.1845	46.6599	77.1798	1.42672	1.86001	8	8	t-test	S
YML072C	TCB3	0.0238832	0.0509622	4.18738	40.7021	66.3491	1.38736	1.46413	8	8	t-test	S
YBR022W	POA1	0.135819	0.2043	4.26476	44.1242	72.4265	2.37176	2.0661	8	8	t-test	S
YOR368W	RAD17	0.000111602	0.000738104	4.2752	44.1471	72.4491	0.89853	0.990267	48	56	t-test	S
YDR099W	BMH2	0.385656	0.481062	4.27836	48.9698	81.2066	3.1307	6.5503	8	8	t-test	S
YDL070W	BDF2	0.28714	0.383568	4.35398	39.2012	63.3192	3.73637	1.24938	8	8	t-test	S
YMR055C	BUB2	0.00256454	0.00966426	4.36541	49.0197	81.139	0.937367	1.28201	8	8	t-test	S
YJR043C	POL32	0.0773692	0.125331	4.41638	38.2995	61.5672	1.84406	2.50445	8	8	t-test	S
YLR330W	CHS5	0.42758	0.520658	4.41898	31.0684	48.4233	5.22055	1.11268	8	8	t-test	S
YNL032W	SIW14	0.308093	0.407001	4.42321	39.4131	63.5783	4.00887	0.773383	8	8	t-test	S
YMR283C	RIT1	0.114482	0.176657	4.44706	52.7054	87.6877	2.25223	2.35127	8	8	t-test	S
YJL013C	MAD3	0.00504419	0.0162686	4.45835	50.6493	83.9312	0.859884	1.8563	8	8	t-test	S
YIL113W	SDP1	0.0674295	0.112096	4.49557	51.4863	85.3844	0.984116	3.5749	8	8	t-test	S
YBR276C	PPS1	0.110353	0.171766	4.49798	47.5804	78.2828	2.41066	1.29255	8	8	t-test	S
YLR183C	TOS4	0.0319769	0.061547	4.53789	47.3595	77.8089	1.31418	2.50576	8	8	t-test	S
YBR093C	PHO5	0.32588	0.421174	4.69396	36.326	57.477	4.19837	3.05675	8	8	t-test	S
YER173W	RAD24	0.000352372	0.00194076	4.70031	47.83	78.3688	1.00817	1.39074	48	56	t-test	S
YNL011C	YNL011C	7.52639e-05	0.000549887	4.7257	45.3612	73.8366	0.772342	1.5362	48	56	t-test	S
YHL020C	OPI1	0.555614	0.656213	4.72596	19.4463	26.7476	7.38602	3.89577	8	8	t-test	S
YKR099W	BAS1	0.349203	0.441748	4.92372	47.1771	76.7764	4.86506	1.38917	8	8	t-test	S
YJL047C	RTT101	0.0685317	0.113062	4.98627	35.8473	56.0759	2.20906	1.89087	8	8	t-test	S
YBR149W	ARA1	2.05243e-05	0.000204102	4.99861	46.9238	76.18	0.828979	1.36069	48	56	t-test	S
YDL012C	YDL012C	1.07303e-05	0.000128048	5.05582	47.0821	76.3638	0.803036	1.33933	48	56	t-test	S
YBR162W-A	YSY6	0.0725815	0.11811	5.05892	45.1664	72.8773	2.31427	1.70219	8	8	t-test	S
YOR047C	STD1	0.0184721	0.0415912	5.0742	47.5542	77.1882	2.01948	0.96304	48	56	t-test	S
YPR160W	GPH1	3.49076e-07	5.68042e-06	5.07438	45.175	72.8649	0.771776	0.89115	48	56	t-test	S
YLR265C	NEJ1	0.262317	0.354376	5.10787	52.6616	86.4074	3.68993	4.13898	8	8	t-test	S
YIL035C	CKA1	0.14599	0.217768	5.25317	41.3076	65.5127	3.0781	2.18067	8	8	t-test	S
YHR167W	THP2	0.42216	0.515814	5.38423	39.5571	62.0937	5.35137	6.65812	8	8	t-test	S
YPL156C	PRM4	2.15717e-06	3.08907e-05	5.39532	46.779	75.1963	0.853006	1.15975	48	56	t-test	S
YML030W	RCF1	6.8489e-08	1.53244e-06	5.40548	42.6833	67.7356	0.760524	0.918065	48	56	t-test	S
YNL125C	ESBP6	0.0075633	0.0220135	5.43648	48.2986	77.8825	1.82573	1.33964	48	56	t-test	S
YML112W	CTK3	0.162135	0.237481	5.56277	50.3796	81.4344	3.2684	3.16783	8	8	t-test	S
YOL068C	HST1	0.0205449	0.0456837	5.58402	45.3938	72.3363	1.7263	2.19665	8	8	t-test	S
YJR058C	APS2	0.0332483	0.0633133	5.59976	41.4042	65.0584	1.97203	2.22493	8	8	t-test	S
YBR092C	PHO3	0.0663569	0.111194	5.67121	42.0827	66.1615	2.1153	3.45871	8	8	t-test	S
YNL030W	HHF2	0.0180823	0.0412927	5.67511	44.1548	69.9195	1.84963	0.958374	8	8	t-test	S
YDR363W	ESC2	0.411181	0.504119	5.72903	40.4519	63.0932	6.50282	1.7456	8	8	t-test	S
YIL103W	DPH1	0.0590259	0.101107	5.90035	42.9347	67.2932	2.54467	1.83345	8	8	t-test	S
YOR346W	REV1	0.0165373	0.038695	5.96966	47.1554	74.8364	1.87724	1.60674	8	8	t-test	S
YMR040W	YET2	0.0538769	0.0936308	5.98685	49.6671	79.3692	2.5209	1.77538	8	8	t-test	S
YNL049C	SFB2	0.0272556	0.0560775	6.11795	46.9023	74.1071	2.17548	1.44293	8	8	t-test	S
YDR419W	RAD30	0.00890182	0.0248973	6.14697	44.2821	69.2933	1.68763	1.74829	8	8	t-test	S
YDR262W	YDR262W	4.80454e-06	5.93112e-05	6.22589	44.7428	69.9871	1.14007	0.925675	48	56	t-test	S
YAL026C	DRS2	0.0289298	0.0578595	6.28597	39.5597	60.4599	2.19834	2.13619	8	8	t-test	S
YGL014W	PUF4	0.110895	0.171863	6.33644	47.3593	74.5405	3.30867	2.60804	8	8	t-test	S
YGR086C	PIL1	0.0210372	0.0462844	6.37153	43.573	67.5969	2.13445	1.45565	8	8	t-test	S
YJL023C	PET130	3.26627e-05	0.000292332	6.37838	46.7604	73.3762	1.30539	1.05698	48	56	t-test	S
YIL139C	REV7	0.012215	0.0312316	6.4174	47.7452	75.0947	1.89681	1.67214	8	8	t-test	S
YML095C	RAD10	0.0616902	0.105167	6.46121	49.0236	77.338	2.89082	1.04637	8	8	t-test	S
YMR167W	MLH1	0.0222953	0.048374	6.59107	47.3562	74.0722	2.2164	1.79009	8	8	t-test	S
YDR075W	PPH3	0.0383379	0.0700253	6.61446	45.6581	70.9442	2.56966	1.47283	8	8	t-test	S
YJR031C	GEA1	0.101401	0.160929	6.85831	51.2339	80.6326	3.1882	4.01014	8	8	t-test	S
YOL062C	APM4	0.00166994	0.00695161	6.86235	48.2155	75.1406	1.3839	1.92128	8	8	t-test	S
YDR501W	PLM2	0.0305816	0.0603934	6.98695	51.4791	80.8444	2.54541	1.79551	8	8	t-test	S
YHR204W	MNL1	0.0279855	0.0572503	7.01836	47.3722	73.3249	2.4537	2.24867	8	8	t-test	S
YML060W	OGG1	0.0310402	0.0603934	7.07472	41.4107	62.3901	2.6133	1.35999	8	8	t-test	S
YOR094W	ARF3	0.0262711	0.0552845	7.09417	45.8375	70.3986	2.35306	2.75515	8	8	t-test	S
YPR052C	NHP6A	0.119675	0.183093	7.15034	50.0699	77.9869	3.53196	4.38346	8	8	t-test	S
YDL077C	VAM6	0.227622	0.313418	7.21621	22.8725	28.4483	4.4438	6.5063	8	8	t-test	S
YDR481C	PHO8	0.0123007	0.0312316	7.34071	47.055	72.1629	2.1401	2.19355	8	8	t-test	S
YOR033C	EXO1	0.00181806	0.00723638	7.38093	43.4646	65.5657	0.887597	3.81796	48	56	t-test	S
YOR189W	IES4	0.00844044	0.0239816	7.40899	50.0401	77.4628	2.03297	1.93518	8	8	t-test	S
YPL001W	HAT1	1.16966e-10	5.23421e-09	7.51558	45.2774	68.615	0.887719	0.812266	48	56	t-test	S
YHR004C	NEM1	0.036508	0.0677194	7.61054	42.3487	63.121	2.92118	1.65311	8	8	t-test	S
YER162C	RAD4	0.00918136	0.024901	7.65005	39.797	58.4127	2.16497	1.05017	8	8	t-test	S
YGL094C	PAN2	0.0236778	0.0509622	7.65213	48.9541	75.0477	1.47103	4.59756	8	8	t-test	S
YKR095W	MLP1	0.147416	0.218982	7.76987	46.0737	69.6	4.685	2.21317	8	8	t-test	S
YOR229W	WTM2	0.0267813	0.0557424	7.81321	49.7595	76.2184	2.5131	3.38137	8	8	t-test	S
YDR030C	RAD28	4.73865e-05	0.000385554	7.88028	47.4354	71.8736	1.05383	1.46227	8	8	t-test	S
YER020W	GPA2	0.0222878	0.048374	7.93046	38.7307	55.9655	2.16973	3.99034	8	8	t-test	S
YCL001W	RER1	0.159774	0.236359	7.99042	44.6672	66.6435	5.03798	1.61324	8	8	t-test	S
YBR028C	YPK3	3.30913e-10	1.18467e-08	8.11823	46.0186	68.8669	0.947261	1.15083	48	56	t-test	S
YGL086W	MAD1	0.00751797	0.0220135	8.15304	50.4381	76.8341	2.20997	1.85065	8	8	t-test	S
YLR170C	APS1	4.18116e-05	0.000348586	8.28476	44.614	66.0121	1.05811	0.777427	8	8	t-test	S
YHR134W	WSS1	0.000984115	0.00451684	8.52141	37.0931	51.9162	1.18612	2.94311	8	8	t-test	S
YKL114C	APN1	0.00490601	0.0159668	8.5663	46.7171	69.3218	1.09333	3.9004	8	8	t-test	S
YMR190C	SGS1	0.00227446	0.00866229	8.67381	39.3483	55.737	1.38737	3.32054	8	8	t-test	S
YKL109W	HAP4	0.000301962	0.00174359	8.71573	36.4185	50.3374	2.13615	1.39153	48	56	t-test	S
YEL056W	HAT2	0.00513537	0.0164148	8.71662	50.9769	76.789	2.10897	2.69244	8	8	t-test	S
YGL163C	RAD54	0.000390379	0.0020859	8.94765	38.6087	53.8955	1.52442	1.04971	8	8	t-test	S
YAL019W	FUN30	0.013929	0.0338903	9.21397	47.6794	69.8935	2.83496	0.730115	8	8	t-test	S
YCR021C	HSP30	8.9305e-05	0.00060903	9.55387	48.2381	70.2911	1.16866	2.37397	8	8	t-test	S
YPL167C	REV3	0.00488656	0.0159668	9.5913	49.3445	72.2334	2.41829	1.78514	8	8	t-test	S
YLR150W	STM1	0.0354999	0.066539	9.60439	47.3721	68.6258	3.63293	2.49204	8	8	t-test	S
YML058W	SML1	0.0254473	0.053906	9.6579	49.8494	73.0299	3.3896	2.06938	8	8	t-test	S
YOR061W	CKA2	0.0292222	0.0581198	10.0017	50.0615	72.7906	3.61439	2.40902	8	8	t-test	S
YPL022W	RAD1	0.00869761	0.0245177	10.1522	40.3466	54.8647	2.83128	2.26068	8	8	t-test	S
YDL182W	LYS20	0.000154805	0.000972286	10.156	46.0282	65.1817	1.07546	2.84242	8	8	t-test	S
YLR135W	SLX4	0.0105165	0.0279249	10.3386	51.1274	74.1153	2.9807	2.48869	8	8	t-test	S
YOR386W	PHR1	0.0115547	0.0299752	10.4063	48.7927	69.75	3.08329	1.30698	8	8	t-test	S
YGL241W	KAP114	0.000940924	0.00437469	10.4761	47.1495	66.6372	1.95947	0.698396	8	8	t-test	S
YBR233W	PBP2	0.00112678	0.0049801	10.5279	52.2168	75.7508	2.04239	2.67861	8	8	t-test	S
YNL121C	TOM70	0.0525216	0.0917207	10.5485	50.85	73.2298	4.50679	1.49144	8	8	t-test	S
YMR273C	ZDS1	0.00281922	0.0101948	10.5534	52.6068	76.413	2.42084	1.55057	8	8	t-test	S
YGL021W	ALK1	0.000534868	0.00269694	10.664	52.7187	76.4154	1.81741	0.623952	8	8	t-test	S
YDL024C	DIA3	8.75955e-05	0.00060903	10.7296	51.944	74.8887	1.55972	1.68479	8	8	t-test	S
YOR086C	TCB1	0.000331796	0.00185599	10.7392	53.6948	78.0524	1.81396	2.181	8	8	t-test	S
YGL019W	CKB1	0.0239152	0.0509622	10.7694	40.746	54.469	3.74766	1.4519	8	8	t-test	S
YGL175C	SAE2	0.00841609	0.0239816	10.8562	46.1441	64.1199	2.64015	4.27373	8	8	t-test	S
YJR052W	RAD7	2.942e-05	0.000284659	10.8996	50.6815	72.2856	1.39465	1.88323	8	8	t-test	S
YDL059C	RAD59	0.0091707	0.024901	10.9432	49.5643	70.1765	3.09764	1.9328	8	8	t-test	S
YGR209C	TRX2	0.00219118	0.00852656	10.9597	49.7567	70.4961	2.41339	1.57423	8	8	t-test	S
YJR066W	TOR1	0.00189136	0.00744072	11.1053	48.4123	67.7886	2.33689	0.840914	8	8	t-test	S
YER179W	DMC1	0.00263011	0.00980814	11.1283	48.4551	67.8246	2.47863	0.860969	8	8	t-test	S
YLL041C	SDH2	0.00752811	0.0220135	11.1493	44.3838	60.3887	2.50829	4.6247	8	8	t-test	S
YDR080W	VPS41	0.0974521	0.155749	11.2882	18.1276	12.4276	5.26336	6.2298	8	8	t-test	S
YNL128W	TEP1	0.00221682	0.00853356	11.3147	48.1654	66.9595	2.4735	1.24113	8	8	t-test	S
YER166W	DNF1	0.00171021	0.0070374	11.3533	48.0001	66.589	2.28025	3.25265	8	8	t-test	S
YDL230W	PTP1	5.65939e-05	0.000440448	11.4046	49.5106	69.2404	1.50704	1.0775	8	8	t-test	S
YLR377C	FBP1	1.23613e-05	0.000142753	11.5035	47.0269	64.5477	1.11858	2.39378	8	8	t-test	S
YMR156C	TPP1	0.00057958	0.0028818	11.6103	51.7058	72.8554	2.05747	1.11786	8	8	t-test	S
YDR289C	RTT103	0.00910707	0.024901	11.6218	51.0088	71.5681	3.27952	1.35531	8	8	t-test	S
YGL090W	LIF1	0.000209112	0.00126885	11.7177	47.2541	64.5714	1.8834	2.0991	8	8	t-test	S
YOR005C	DNL4	0.182252	0.254867	11.8346	48.1449	65.9775	1.23761	14.4231	8	8	t-test	S
YDR483W	KRE2	0.000362574	0.00196669	11.8348	52.4789	73.8524	2.08007	2.53688	8	16	t-test	S
YJR005W	APL1	9.01636e-05	0.00060903	11.8779	50.2999	69.8147	1.72317	2.15627	8	8	t-test	S
YMR152W	YIM1	7.96506e-05	0.000570299	12.0852	48.8198	66.7485	1.7069	2.35851	8	8	t-test	S
YCL011C	GBP2	0.00269588	0.00994974	12.2975	49.1457	66.9549	2.79345	1.64587	8	8	t-test	S
YML021C	UNG1	0.0140105	0.0338903	12.524	49.3302	66.8786	3.85613	0.810416	8	8	t-test	S
YER041W	YEN1	0.00173079	0.00704116	12.5859	51.216	70.1929	2.63612	1.27743	8	8	t-test	S
YDR093W	DNF2	0.00281357	0.0101948	12.6004	55.0489	77.1312	2.86227	1.32956	8	8	t-test	S
YER120W	SCS2	0.0118575	0.0305395	12.6839	52.1137	71.6459	3.77111	1.09272	8	8	t-test	S
YPL194W	DDC1	3.0898e-05	0.000290737	12.6956	50.8477	69.3242	1.58721	1.28452	8	8	t-test	S
YER075C	PTP3	0.00130377	0.00567207	12.8941	51.5995	70.3295	2.5792	1.26463	8	8	t-test	S
YLR019W	PSR2	0.000663248	0.00320868	12.9003	51.4886	70.1168	2.35874	1.50085	8	8	t-test	S
YJL044C	GYP6	0.00141871	0.0060464	13.0841	49.6412	66.4261	2.37761	4.16227	8	8	t-test	S
YBL019W	APN2	0.00103193	0.00467633	13.0898	49.0946	65.4225	2.57173	1.81259	8	8	t-test	S
YBR073W	RDH54	0.00554578	0.0172643	13.4052	43.5717	54.814	3.44989	2.76807	8	8	t-test	S
YMR162C	DNF3	0.00902354	0.024901	13.8128	56.9557	78.3927	3.89833	2.34077	8	8	t-test	S
YMR201C	RAD14	6.53099e-05	0.000487103	13.8129	48.4744	62.9817	1.94349	2.15901	8	8	t-test	S
YMR183C	SSO2	3.4953e-09	1.13756e-07	13.9711	43.4702	53.6013	0.805669	1.15965	8	8	t-test	S
YJR110W	YMR1	4.2084e-06	5.58002e-05	14.4107	53.9855	71.9093	1.51677	1.65439	8	8	t-test	S
YDR097C	MSH6	0.000288339	0.00169222	14.6031	51.0105	66.1541	2.42101	1.98815	8	8	t-test	S
YLR035C	MLH2	0.015629	0.0370542	14.6487	54.9031	73.1443	4.62733	1.73325	8	8	t-test	S
YOR144C	ELG1	0.0151171	0.0360795	14.6837	51.5889	67.0585	4.60395	1.60659	8	8	t-test	S
YMR285C	NGL2	0.00144244	0.00607521	14.8962	48.9816	61.9348	2.99923	1.14922	8	8	t-test	S
YLL010C	PSR1	0.000450523	0.00237187	15.0283	55.657	73.8242	2.66014	2.54939	8	8	t-test	S
YLR043C	TRX1	1.41508e-05	0.000153514	15.1007	51.4604	66.0674	1.74105	2.74248	8	8	t-test	S
YKL067W	YNK1	0.00434385	0.0148105	15.6117	53.8361	69.4556	3.7852	0.769939	8	8	t-test	S
YDR263C	DIN7	0.0391908	0.0712197	15.7762	56.2341	73.5139	6.22407	1.68538	8	8	t-test	S
YGR142W	BTN2	2.95076e-06	4.06297e-05	16.0489	53.2956	67.6791	1.59361	2.56114	8	8	t-test	S
YKL025C	PAN3	0.00538492	0.0169773	16.4398	57.194	74.0524	4.21654	2.76603	8	8	t-test	S
YOR026W	BUB3	4.18693e-05	0.000348586	16.7147	30.7104	25.4308	1.17426	4.03002	8	8	t-test	S
YIL149C	MLP2	5.21534e-05	0.000414909	17.9157	52.0181	61.9657	2.45629	2.63028	8	8	t-test	S
YOL043C	NTG2	3.75313e-07	5.84182e-06	17.9597	53.9458	65.3884	1.23321	0.757236	8	8	t-test	S
YBR034C	HMT1	0.00609005	0.0186345	18.6845	55.0746	66.1227	4.84643	1.27951	8	8	t-test	S
YJR001W	AVT1	1.7314e-05	0.000177097	18.7922	50.8609	58.2705	2.15422	3.64096	8	8	t-test	S
YKL065C	YET1	0.000468585	0.00239648	19.2528	54.7223	64.4498	3.28976	1.68473	8	8	t-test	S
YBL032W	HEK2	0.000610622	0.00299456	19.2731	51.6358	58.8046	3.35177	1.12294	8	8	t-test	S
YNL267W	PIK1	0.0139118	0.0338903	20.3639	49.5949	53.1142	3.08946	11.1837	8	8	t-test	S
YGR208W	SER2	0.0440155	0.0791837	20.4215	36.1859	28.6448	7.7518	8.39014	8	8	t-test	S
YNL273W	TOF1	0.00962749	0.0259146	20.4705	47.1765	48.526	1.81427	10.6317	8	8	t-test	S
YOR039W	CKB2	0.010836	0.028316	21.5271	40.9109	35.2213	3.57185	11.0849	8	8	t-test	S
YNL270C	ALP1	0.0542655	0.0938505	25.4328	28.4886	5.5526	10.9973	2.33031	8	8	t-test	S
YOL112W	MSB4	0.000243554	0.00145321	26.2304	48.038	39.6254	2.93068	7.72814	8	8	t-test	S
YPR164W	MMS1	0.000811124	0.00382082	28.3766	54.0092	46.5757	5.11695	1.1998	8	8	t-test	S

## Sheet: YKU70 screen
QFA results for yku70Δ at 37°C
query strain: yku70Δ
control strain: lyp1Δ
GI: Genetic interaction (E: enhancer; S: suppressor)
GIS: Genetic interaction score
significant genetic interaction threshold: q<0.05
Query/control fitness: mean fitness (MDR x MDP) per genotype
Query SE/control SE: Calculated standart error of the mean fitness
Query count/control count: number of growth curves analysed per genotype
R package version: 0.0-44
#########################################################
ORF	Gene	P	Q	GIS	QueryFitnessSummary	ControlFitnessSummary	QuerySE	ControlSE	QueryCount	ControlCount	TestType	Type
YPR023C	EAF3	0.00736638	0.0191585	-53.8683	0	73.2493	0	3.42468	4	8	wilcoxon	E
YMR285C	NGL2	0.00802185	0.0191585	-43.1245	0	61.3927	0.383444	1.14922	4	8	wilcoxon	E
YNL273W	TOF1	0.299575	0.394293	-42.8904	0	62.0182	13.2577	10.6317	4	8	wilcoxon	E
YMR284W	YKU70	0.00736638	0.0191585	-42.4488	0	59.6452	0	1.27192	4	8	wilcoxon	E
YDR369C	XRS2	0.0040404	0.0113895	-40.7154	5.25751	64.2253	0.616045	2.9332	4	8	wilcoxon	E
YNL250W	RAD50	6.20619e-12	3.17402e-10	-35.8046	3.35979	53.8438	0.411098	2.03758	24	48	wilcoxon	E
YJL115W	ASF1	0.00736638	0.0191585	-34.5102	0	51.817	0	3.70703	4	8	wilcoxon	E
YDL074C	BRE1	0.000412797	0.0070372	-34.348	4.03905	50.8994	1.1503	3.26132	4	16	wilcoxon	E
YDR496C	PUF6	2.41591e-12	2.16224e-10	-31.7101	8.85161	57.6746	1.67553	1.13832	24	56	wilcoxon	E
YKL113C	RAD27	0.0040404	0.0113895	-31.389	10.9368	57.9632	1.54167	4.59681	4	8	wilcoxon	E
YBR289W	SNF5	0.0370772	0.0711314	-31.3132	0	43.0492	0	11.5482	4	8	wilcoxon	E
YGL168W	HUR1	0.00836037	0.0195622	-29.4899	0.460625	43.0135	0.550599	4.78416	4	8	wilcoxon	E
YLR015W	BRE2	0.0040404	0.0113895	-29.3293	22.2938	70.8987	2.98158	3.95634	4	8	wilcoxon	E
YHR167W	THP2	0.0161616	0.0338354	-27.5982	17.057	65.0229	3.92491	6.65812	4	8	wilcoxon	E
YDL155W	CLB3	0.0040404	0.0113895	-27.2154	28.9278	76.9108	9.08006	2.04244	4	8	wilcoxon	E
YML032C	RAD52	5.89419e-12	3.17402e-10	-26.4577	14.5837	57.2213	1.36197	1.95032	24	56	wilcoxon	E
YDL042C	SIR2	0.0370772	0.0711314	-25.2432	0	42.2425	0	11.864	4	8	wilcoxon	E
YNL082W	PMS1	0.0040404	0.0113895	-25.0653	38.3523	86.1233	2.5126	3.97167	4	8	wilcoxon	E
YPR135W	CTF4	0.104184	0.177521	-24.3566	0	42.6	9.44741	4.69377	4	8	wilcoxon	E
YDR269C	YDR269C	1.78806e-12	2.16224e-10	-23.503	26.8979	70.2678	1.27869	1.33257	24	56	wilcoxon	E
YBL088C	TEL1	0.0040404	0.0113895	-22.8947	39.1592	87.7124	0.630551	5.012	4	8	wilcoxon	E
YNR059W	MNT4	1.78806e-12	2.16224e-10	-22.8329	32.1956	74.9115	0.917522	1.27962	24	56	wilcoxon	E
YAL002W	VPS8	0.0040404	0.0113895	-20.4314	31.0468	72.8328	2.31992	7.13388	4	8	wilcoxon	E
YAR003W	SWD1	0.214141	0.305429	-20.246	33.5999	75.7561	0.775681	7.33689	4	8	wilcoxon	E
YHR077C	NMD2	2.07886e-12	2.16224e-10	-19.5756	33.9562	72.2224	0.843254	1.67761	24	56	wilcoxon	E
YLR233C	EST1	3.782e-12	2.70791e-10	-18.8995	34.8341	75.2597	1.28601	1.28824	24	56	wilcoxon	E
YLR394W	CST9	0.0161616	0.0338354	-18.6226	36.6407	77.7818	2.42684	4.23834	4	8	wilcoxon	E
YHL019C	APM2	0.0040404	0.0113895	-18.238	39.2455	80.5138	3.09725	4.72534	4	8	wilcoxon	E
YBR114W	RAD16	0.0040404	0.0113895	-17.7245	36.0327	77.7629	3.56694	2.33473	4	8	wilcoxon	E
YIL084C	SDS3	0.0040404	0.0113895	-17.4526	29.9467	66.2626	0.946744	3.22767	4	8	wilcoxon	E
YOR382W	FIT2	3.86588e-11	1.72998e-09	-17.2724	34.5028	73.3714	1.15758	1.12253	24	56	wilcoxon	E
YBR010W	HHT1	0.0161616	0.0338354	-17.2241	31.7224	73.4027	5.25169	1.91401	4	8	wilcoxon	E
YNL154C	YCK2	0.0040404	0.0113895	-16.8149	40.8112	80.9295	4.52246	1.53059	4	8	wilcoxon	E
YBR009C	HHF1	0.0161616	0.0338354	-16.5906	34.0846	76.0793	4.36757	3.96198	4	8	wilcoxon	E
YBL051C	PIN4	0.0040404	0.0113895	-15.9784	37.6362	72.5082	1.88846	2.47337	4	8	wilcoxon	E
YLR032W	RAD5	0.00808081	0.0191585	-14.8733	35.0117	74.3196	2.64043	5.82168	4	8	wilcoxon	E
YMR048W	CSM3	0.0040404	0.0113895	-14.2476	48.3361	88.0493	0.780187	3.17602	4	8	wilcoxon	E
YNL201C	PSY2	0.0040404	0.0113895	-13.5781	39.182	75.1919	4.4569	1.99311	4	8	wilcoxon	E
YGR100W	MDR1	0.0040404	0.0113895	-13.427	45.105	83.1271	1.68886	2.51269	4	8	wilcoxon	E
YDL065C	PEX19	0.0161616	0.0338354	-13.3533	53.0396	92.4575	1.7964	3.3747	4	8	wilcoxon	E
YMR307W	GAS1	0.0040404	0.0113895	-12.7834	28.7992	58.5028	1.12072	4.48505	4	8	wilcoxon	E
YHL006C	SHU1	0.0040404	0.0113895	-12.6	43.4208	74.7956	2.79106	2.10948	4	8	wilcoxon	E
YMR106C	YKU80	0.109091	0.177521	-12.2337	56.4148	97.7661	1.28299	5.11004	4	8	wilcoxon	E
YOL090W	MSH2	0.0484848	0.0881095	-11.8856	35.771	67.1041	4.36521	1.0601	4	8	wilcoxon	E
YDR440W	DOT1	0.0040404	0.0113895	-11.6985	37.2444	69.6126	8.47406	1.86299	4	8	wilcoxon	E
YMR186W	HSC82	0.00808081	0.0191585	-11.4305	39.6542	72.8594	2.2446	1.89679	4	8	wilcoxon	E
YIL153W	RRD1	0.0282828	0.0556333	-11.0151	23.5668	52.9856	2.56116	1.95538	4	8	wilcoxon	E
YCL061C	MRC1	0.00808081	0.0191585	-10.924	30.168	56.9472	2.65462	1.75983	4	8	wilcoxon	E
YNL085W	MKT1	0.00808081	0.0191585	-10.6493	46.3952	79.3738	3.35236	1.75311	4	8	wilcoxon	E
YHR154W	RTT107	0.0161616	0.0338354	-10.3516	54.9415	91.7522	1.08626	3.93992	4	8	wilcoxon	E
YER095W	RAD51	0.0040404	0.0113895	-10.2998	34.5121	64.3297	1.3341	1.79841	4	8	wilcoxon	E
YDR004W	RAD57	0.0161616	0.0338354	-10.2935	39.6052	70.7584	1.85371	2.98149	4	8	wilcoxon	E
YHR031C	RRM3	0.0282828	0.0556333	-9.73588	39.0427	73.3131	2.42994	2.65103	4	8	wilcoxon	E
YMR137C	PSO2	0.0282828	0.0556333	-9.60781	47.1533	76.1974	4.8922	2.21865	4	8	wilcoxon	E
YNL218W	MGS1	0.0040404	0.0113895	-8.91945	57.263	93.1124	0.647835	1.50372	4	8	wilcoxon	E
YPL127C	HHO1	0.0040404	0.0113895	-8.73693	41.8189	72.6346	1.49552	1.44819	4	8	wilcoxon	E
YDR386W	MUS81	0.214141	0.305429	-8.4297	54.2231	88.5638	0.8831	6.1198	4	8	wilcoxon	E
YKR095W	MLP1	0.0161616	0.0338354	-8.42257	40.7939	70.3774	1.91716	2.21317	4	8	wilcoxon	E
YMR173W	DDR48	0.0484848	0.0881095	-8.37745	42.2316	72.1456	2.29987	2.01205	4	8	wilcoxon	E
YIR002C	MPH1	0.0282828	0.0556333	-8.25104	44.916	72.1133	4.53805	4.55463	4	8	wilcoxon	E
YDR373W	FRQ1	0.109091	0.177521	-8.00183	45.4518	75.959	4.08372	1.32405	4	8	wilcoxon	E
YLL002W	RTT109	0.0040404	0.0113895	-7.92199	29.5035	52.6541	0.722927	2.47892	4	8	wilcoxon	E
YGR086C	PIL1	0.214141	0.305429	-7.82249	40.5934	66.2434	3.71227	1.45565	4	8	wilcoxon	E
YBR275C	RIF1	0.214141	0.305429	-7.78492	43.1166	72.4913	2.69225	0.715699	4	8	wilcoxon	E
YMR283C	RIT1	0.0727273	0.12639	-7.67444	54.7989	86.7205	14.3249	2.35127	4	8	wilcoxon	E
YGL127C	SOH1	1	1	-7.58872	5.48119	18.9103	0.372339	7.15676	4	8	wilcoxon	E
YNL307C	MCK1	0.0040404	0.0113895	-7.51793	40.5808	67.6966	1.35436	1.52941	4	8	wilcoxon	E
YNL107W	YAF9	0.367677	0.450782	-7.42596	51.1727	78.2677	3.25413	2.19538	4	8	wilcoxon	E
YMR078C	CTF18	0.0484848	0.0881095	-7.1092	36.607	62.4793	0.984718	2.58298	4	8	wilcoxon	E
YPR119W	CLB2	5.07118e-06	0.000129677	-7.08717	45.6746	72.9743	0.911233	1.65571	24	56	wilcoxon	E
YLR265C	NEJ1	0.282828	0.373626	-6.8708	56.872	91.7327	1.31961	4.13898	4	8	wilcoxon	E
YLR320W	MMS22	0.569697	0.645416	-6.79492	30.3163	52.5576	0.666056	4.42549	4	8	wilcoxon	E
YDR076W	RAD55	0.0282828	0.0556333	-6.64273	37.0867	61.5157	1.77257	2.47883	4	8	wilcoxon	E
YDR411C	DFM1	0.153535	0.241077	-6.44791	58.85	91.9728	0.958842	3.63518	4	8	wilcoxon	E
YBR082C	UBC4	0.121775	0.197265	-6.33888	43.6438	69.8872	0.891994	2.54284	4	16	wilcoxon	E
YCR092C	MSH3	0.153535	0.241077	-6.16877	43.9008	75.145	3.4473	2.36163	4	8	wilcoxon	E
YLR376C	PSY3	0.0727273	0.12639	-6.11904	55.89	87.0473	1.62233	2.73932	4	8	wilcoxon	E
YER028C	MIG3	0.0484848	0.0881095	-6.11245	62.0794	94.1488	1.3985	4.35043	4	8	wilcoxon	E
YNL106C	INP52	0.252325	0.355639	-5.98578	0	26.6438	7.23126	6.52928	4	8	wilcoxon	E
YBR288C	APM3	0.0040404	0.0113895	-5.82134	46.7864	73.3772	1.5218	1.775	4	8	wilcoxon	E
YBL003C	HTA2	0.153535	0.241077	-4.98621	58.5173	89.5187	1.04939	3.44725	4	8	wilcoxon	E
YOR279C	RFM1	0.153535	0.241077	-4.89819	55.1861	84.8582	0.446143	2.64221	4	8	wilcoxon	E
YLR373C	VID22	0.109091	0.177521	-4.85055	42.7724	68.3859	1.68856	3.26981	4	8	wilcoxon	E
YAL015C	NTG1	0.153535	0.241077	-4.83544	58.3564	90.4333	1.52888	2.29353	4	8	wilcoxon	E
YHR108W	GGA2	0.0727273	0.12639	-4.79245	38.7196	62.4026	2.17981	1.75924	4	8	wilcoxon	E
YDR363W-A	SEM1	0.460606	0.544214	-4.63411	42.0746	65.7147	0.977691	3.75853	4	8	wilcoxon	E
YCL001W	RER1	0.214141	0.305429	-4.33393	42.0783	66.2667	5.11459	1.61324	4	8	wilcoxon	E
YBR022W	POA1	0.214141	0.305429	-3.56402	47.9189	72.4827	3.27371	2.0661	4	8	wilcoxon	E
YBR098W	MMS4	0.367677	0.450782	-3.40109	48.7798	75.5703	1.77217	3.22854	4	8	wilcoxon	E
YHR135C	YCK1	0.367677	0.450782	-3.18046	54.0324	82.05	1.24105	4.46503	4	8	wilcoxon	E
YBL091C-A	SCS22	0.367677	0.450782	-3.10399	46.4466	68.8086	3.37171	1.80679	4	8	wilcoxon	E
YKR099W	BAS1	0.214141	0.305429	-2.50588	53.2892	78.0806	0.31946	1.38917	4	8	wilcoxon	E
YOL068C	HST1	0.460606	0.544214	-2.39248	49.7564	72.8002	1.55075	2.19665	4	8	wilcoxon	E
YDL109C	YDL109C	0.177297	0.274773	-2.31435	48.2337	71.1904	1.0811	1.54229	24	56	wilcoxon	E
YDR372C	VPS74	0.808081	0.853371	-2.10612	58.668	87.6035	1.83292	5.50517	4	8	wilcoxon	E
YLR410W	VIP1	0.109091	0.177521	-2.06724	42.8789	62.8297	2.04269	1.57041	4	8	wilcoxon	E
YLR039C	RIC1	0.00736638	0.0191585	-2.03237	0	2.87217	0	0.608394	4	8	wilcoxon	E
YNL030W	HHF2	0.282828	0.373626	-1.92781	47.2615	68.7401	2.87921	0.958374	4	8	wilcoxon	E
YML112W	CTK3	0.282828	0.373626	-1.92626	54.1455	79.5815	0.452384	3.16783	4	8	wilcoxon	E
YNL032W	SIW14	0.367677	0.450782	-1.70627	43.5184	63.1158	1.46687	0.773383	4	8	wilcoxon	E
YML072C	TCB3	0.808081	0.853371	-1.56826	46.3477	67.8771	2.53465	1.46413	4	8	wilcoxon	E
YOR086C	TCB1	0.367677	0.450782	-1.52351	55.1054	80.4224	0.431939	2.181	4	8	wilcoxon	E
YLR387C	REH1	0.392178	0.47918	-1.47594	54.1795	77.8059	1.47369	2.28832	24	56	wilcoxon	E
YBL047C	EDE1	0.282828	0.373626	-1.46772	52.0349	74.8108	1.12853	2.01585	4	8	wilcoxon	E
YDR227W	SIR4	0.0370772	0.0711314	-1.46421	0	1.59939	0	0.710161	4	8	wilcoxon	E
YJR090C	GRR1	0.0174306	0.03628	-1.43106	0	1.92679	0	0.52434	4	8	wilcoxon	E
YDR225W	HTA1	0.569697	0.645416	-1.34684	44.7418	66.025	1.07979	3.80158	4	8	wilcoxon	E
YDL234C	GYP7	0.367677	0.450782	-1.14278	59.8255	86.151	0.592665	2.82982	4	8	wilcoxon	E
YIL113W	SDP1	0.569697	0.645416	-0.982908	59.5803	85.2067	0.436986	3.5749	4	8	wilcoxon	E
YDL236W	PHO13	0.682828	0.749854	-0.80866	58.6959	84.65	1.18516	2.34486	4	8	wilcoxon	E
YNL125C	ESBP6	0.574322	0.648604	-0.791941	54.172	77.6653	0.611975	1.33964	24	56	wilcoxon	E
YNL270C	ALP1	0.549409	0.638598	-0.701872	0.570108	4.12137	14.4375	2.33031	4	8	wilcoxon	E
YLR357W	RSC2	0.0719823	0.12639	-0.621668	0	0.675646	0	0.450424	4	8	wilcoxon	E
YKL032C	IXR1	0.682828	0.749854	-0.62093	44.3104	63.5415	1.57019	1.98862	4	8	wilcoxon	E
YDL200C	MGT1	0.933333	0.960153	-0.547986	58.5441	84.1012	1.74504	2.41592	4	8	wilcoxon	E
YER142C	MAG1	0.933333	0.960153	-0.462133	57.5019	83.5398	1.76341	2.66177	4	8	wilcoxon	E
YML060W	OGG1	0.933333	0.960153	-0.407157	43.9892	62.8218	4.39302	1.35999	4	8	wilcoxon	E
YPL096W	PNG1	0.764771	0.837272	-0.404637	54.2594	77.3123	0.67136	1.33225	24	56	wilcoxon	E
YNL121C	TOM70	0.808081	0.853371	-0.320417	51.8217	73.0688	0.613785	1.49144	4	8	wilcoxon	E
YOR189W	IES4	0.933333	0.960153	-0.284554	55.5816	76.5609	1.22432	1.93518	4	8	wilcoxon	E
YBR223C	TDP1	0.933333	0.960153	-0.260377	57.0102	79.7059	0.747741	2.56963	4	8	wilcoxon	E
YMR119W	ASI1	0.963467	0.988313	-0.197778	56.8334	80.7861	2.79194	2.02285	4	16	wilcoxon	E
YDL154W	MSH5	1	1	-0.197705	57.8223	83.4771	1.40606	4.47062	4	8	wilcoxon	E
YIL128W	MET18	1	1	-0.0277725	4.09335	28.6115	10.7121	8.2394	4	8	wilcoxon	E
YER162C	RAD4	1	1	-0.01728	41.4451	58.3336	2.41749	1.05017	4	8	wilcoxon	E
YIL076W	SEC28	0.220151	0.311518	-8.41618e-05	0	0	0	0.56237	4	8	wilcoxon	E
YMR224C	MRE11	8.49434e-05	0.00178881	-6.31564e-05	0	0	0	0.25561	24	56	wilcoxon	E
YLR318W	EST2	0.220151	0.311518	-5.88946e-05	0	0	0	0.248186	4	8	wilcoxon	E
YNL268W	LYP1	0.0640366	0.115202	-3.8429e-05	0	0	2.91399	3.70178	24	56	wilcoxon	E
YDR034C	LYS14	0.627339	0.70625	-3.31952e-05	0	0	1.96767	4.12015	24	56	wilcoxon	E
YEL063C	CAN1	0.776342	0.847349	-3.3051e-05	0	3.44397e-17	6.30581	0.518134	4	8	wilcoxon	E
YNL087W	TCB2	0.931112	0.960153	-2.89231e-05	2.43558	5.55667	6.80653	4.67481	4	8	wilcoxon	E
YLR262C	YPT6	0.544329	0.635654	-1.15168e-05	0	0	0.579248	1.74454	4	8	wilcoxon	E
YOR141C	ARP8	0.360765	0.450782	0	0	0	0	0.453899	4	8	wilcoxon	E
YLR151C	PCD1	1	1	0.0307719	57.3503	81.0453	0.478849	1.89385	4	8	wilcoxon	S
YKL198C	PTK1	0.970687	0.992874	0.0430164	58.9326	82.0944	0.943491	1.42375	24	56	wilcoxon	S
YOL095C	HMI1	0.682828	0.749854	0.197319	39.1645	54.9373	0.75004	2.40352	4	8	wilcoxon	S
YOR005C	DNL4	0.932206	0.960153	0.213824	60.8647	86.748	2.21747	14.4231	4	8	wilcoxon	S
YBL037W	APL3	1	1	0.29966	60.5132	85.3475	1.17818	1.98817	4	8	wilcoxon	S
YLL019C	KNS1	0.80512	0.853371	0.320871	49.8399	68.387	0.730445	1.44465	24	56	wilcoxon	S
YGL163C	RAD54	0.808081	0.853371	0.400101	38.7252	53.2247	1.71145	1.04971	4	8	wilcoxon	S
YGL217C	YGL217C	0.821412	0.864899	0.432977	52.0511	71.6864	2.47221	1.53887	24	56	wilcoxon	S
YDR075W	PPH3	0.808081	0.853371	0.673952	50.9543	71.1433	0.843839	1.47283	4	8	wilcoxon	S
YER089C	PTC2	0.808081	0.853371	0.679255	60.1426	84.1525	0.945634	5.35109	4	8	wilcoxon	S
YMR206W	YMR206W	0.518481	0.608577	0.857287	53.2264	73.9954	1.00311	1.48372	24	56	wilcoxon	S
YCR014C	POL4	0.682828	0.749854	0.99064	53.2146	75.477	1.62384	2.10136	4	8	wilcoxon	S
YDL040C	NAT1	0.491651	0.578984	1.02871	54.6101	76.6061	1.07282	1.07919	24	56	wilcoxon	S
YBR276C	PPS1	0.282828	0.373626	1.26721	57.0354	78.5655	0.516242	1.29255	4	8	wilcoxon	S
YCL016C	DCC1	0.569697	0.645416	1.27469	42.3788	58.4451	0.417251	3.42542	4	8	wilcoxon	S
YJL013C	MAD3	0.682828	0.749854	1.30638	61.306	83.9298	1.6248	1.8563	4	8	wilcoxon	S
YMR169C	ALD3	0.427967	0.519363	1.32872	56.7265	76.3917	0.696494	1.58904	24	56	wilcoxon	S
YLR150W	STM1	0.569697	0.645416	1.33554	50.8508	69.3476	0.573233	2.49204	4	8	wilcoxon	S
YMR055C	BUB2	0.367677	0.450782	1.36024	59.1759	81.6324	1.49846	1.28201	4	8	wilcoxon	S
YMR176W	ECM5	0.305999	0.401273	1.36076	57.4708	79.074	0.798359	1.35208	24	56	wilcoxon	S
YPL156C	PRM4	0.321121	0.419567	1.37593	53.9497	74.0511	0.885732	1.15975	24	56	wilcoxon	S
YDL012C	YDL012C	0.272577	0.373626	1.40128	54.7914	75.2275	0.939896	1.33933	24	56	wilcoxon	S
YOR109W	INP53	0.367677	0.450782	1.4257	47.3376	65.0054	1.7292	1.13657	4	8	wilcoxon	S
YMR040W	YET2	0.460606	0.544214	1.53145	57.2715	78.538	1.31173	1.77538	4	8	wilcoxon	S
YOR027W	STI1	0.569697	0.645416	1.53395	50.6295	68.8274	0.993669	1.31276	4	8	wilcoxon	S
YGL087C	MMS2	0.682828	0.749854	1.57645	61.3332	84.0721	2.90198	2.67364	4	8	wilcoxon	S
YLR183C	TOS4	0.460606	0.544214	1.60184	57.9826	80.5354	1.86806	2.50576	4	8	wilcoxon	S
YMR273C	ZDS1	0.282828	0.373626	1.61391	55.6757	75.9622	0.74924	1.55057	4	8	wilcoxon	S
YNL049C	SFB2	0.808081	0.853371	1.6982	54.0075	74.5258	1.86436	1.44293	4	8	wilcoxon	S
YGL179C	TOS3	0.170649	0.265619	1.79884	55.8066	75.3805	2.53297	1.14945	24	56	wilcoxon	S
YPR052C	NHP6A	0.367677	0.450782	1.82871	53.9841	73.8628	1.44659	4.38346	4	8	wilcoxon	S
YMR105C	PGM2	0.170649	0.265619	1.83643	55.9027	75.8903	0.732531	1.3224	24	56	wilcoxon	S
YAL014C	SYN8	0.460606	0.544214	1.88675	57.1777	78.1994	1.82204	4.35344	4	8	wilcoxon	S
YER075C	PTP3	0.282828	0.373626	1.9039	51.992	70.1773	1.20535	1.26463	4	8	wilcoxon	S
YJL094C	KHA1	0.0411458	0.0783521	1.92723	49.2094	67.7814	2.26316	0.694388	24	56	wilcoxon	S
YEL037C	RAD23	0.214141	0.305429	2.00396	53.5797	72.4905	0.0920511	1.86018	4	8	wilcoxon	S
YJR058C	APS2	1	1	2.04307	47.0085	65.173	5.496	2.22493	4	8	wilcoxon	S
YKL212W	SAC1	0.268768	0.373626	2.0683	4.26579	3.29818	1.48396	5.57871	4	8	wilcoxon	S
YNL128W	TEP1	0.282828	0.373626	2.13936	49.9119	66.998	1.30068	1.24113	4	8	wilcoxon	S
YBR175W	SWD3	1	1	2.15381	34.0635	43.7144	0.742692	7.64223	4	8	wilcoxon	S
YDR358W	GGA1	0.394066	0.479849	2.15421	2.43211	0	1.64712	0.418073	4	8	wilcoxon	S
YEL064C	AVT2	0.795376	0.853371	2.19457	30.9454	74.5949	17.8973	12.6142	4	8	wilcoxon	S
YOR061W	CKA2	0.460606	0.544214	2.20239	52.1929	69.9359	1.40534	2.40902	4	8	wilcoxon	S
YNL325C	FIG4	0.367677	0.450782	2.23496	53.0255	70.3545	13.6947	1.79223	4	8	wilcoxon	S
YLR436C	ECM30	0.282828	0.373626	2.23708	56.2942	74.4838	2.85262	0.926396	4	8	wilcoxon	S
YJR031C	GEA1	0.367677	0.450782	2.39498	57.9102	77.3842	0.752315	4.01014	4	8	wilcoxon	S
YOR202W	HIS3	0.00993479	0.0230952	2.44708	55.6187	74.2046	1.52582	1.31205	56	144	wilcoxon	S
YER019C-A	SBH2	0.153535	0.241077	2.46906	57.2903	76.4991	1.40922	1.36857	4	8	wilcoxon	S
YNL031C	HHT2	0.282828	0.373626	2.5718	50.5187	67.3623	1.27986	1.54997	4	8	wilcoxon	S
YKL076C	PSY1	0.460606	0.544214	2.63371	48.4298	64.1883	1.338	2.86964	4	8	wilcoxon	S
YBR149W	ARA1	0.0822837	0.141623	2.6838	55.6991	74.3478	0.882792	1.36069	24	56	wilcoxon	S
YGL058W	RAD6	0.367677	0.450782	2.7758	59.9541	78.5531	1.75511	2.62764	4	8	wilcoxon	S
YJR154W	YJR154W	0.0822837	0.141623	2.81404	55.7555	76.0767	1.11172	1.5103	24	56	wilcoxon	S
YNL267W	PIK1	0.682828	0.749854	2.85659	50.1309	70.1726	13.3514	11.1837	4	8	wilcoxon	S
YJR082C	EAF6	0.367677	0.450782	2.9103	52.7692	71.7553	1.48976	2.23348	4	8	wilcoxon	S
YHR012W	VPS29	0.367677	0.450782	3.02285	42.1333	52.3931	2.48276	2.54937	4	8	wilcoxon	S
YBR093C	PHO5	0.214141	0.305429	3.09179	42.0648	53.7158	1.03046	3.05675	4	8	wilcoxon	S
YNL011C	YNL011C	0.0271022	0.0556333	3.11155	54.7635	72.8733	0.500858	1.5362	24	56	wilcoxon	S
YJL023C	PET130	0.0150771	0.0338354	3.28963	54.7946	71.6362	0.874385	1.05698	24	56	wilcoxon	S
YEL062W	NPR2	0.808081	0.853371	3.29471	55.1175	71.7304	13.8755	3.44324	4	8	wilcoxon	S
YOL013C	HRD1	0.282828	0.373626	3.38028	57.0808	74.9504	1.51838	2.1793	4	8	wilcoxon	S
YJR035W	RAD26	0.460606	0.544214	3.4351	54.3119	73.4319	2.09919	3.75576	4	8	wilcoxon	S
YER173W	RAD24	0.0334991	0.0655337	3.5408	58.8072	76.3254	0.687778	1.39074	24	56	wilcoxon	S
YML095C	RAD10	0.0040404	0.0113895	3.55968	58.4841	77.884	1.05897	1.04637	4	8	wilcoxon	S
YDR057W	YOS9	0.214141	0.305429	3.57439	52.11	67.5694	1.55354	2.41401	4	8	wilcoxon	S
YLR087C	CSF1	0.682828	0.749854	3.61295	39.3284	51.4383	1.28237	4.25222	4	8	wilcoxon	S
YDR501W	PLM2	0.282828	0.373626	3.6623	61.0848	80.5431	1.24211	1.79551	4	8	wilcoxon	S
YOR047C	STD1	0.00514222	0.0142707	3.6881	58.2558	76.3524	1.0194	0.96304	24	56	wilcoxon	S
YML021C	UNG1	0.808081	0.853371	3.71656	50.7172	67.512	4.71948	0.810416	4	8	wilcoxon	S
YDR093W	DNF2	0.0040404	0.0113895	3.84485	59.4239	78.7498	0.641109	1.32956	4	8	wilcoxon	S
YPR160W	GPH1	0.000141294	0.00266227	3.86565	55.2551	71.968	0.655029	0.89115	24	56	wilcoxon	S
YJL187C	SWE1	0.367677	0.450782	3.87458	59.911	78.509	0.875105	2.77556	4	8	wilcoxon	S
YJR043C	POL32	0.00808081	0.0191585	3.91382	49.7883	64.3417	0.589356	2.50445	4	8	wilcoxon	S
YKL164C	PIR1	0.214141	0.305429	3.94349	58.2691	75.5067	0.95702	2.05857	4	8	wilcoxon	S
YEL056W	HAT2	0.282828	0.373626	3.95499	57.5568	75.6089	1.83534	2.69244	4	8	wilcoxon	S
YBR073W	RDH54	0.569697	0.645416	4.0467	40.7759	51.6744	4.17138	2.76807	4	8	wilcoxon	S
YBR028C	YPK3	0.000411	0.0070372	4.14398	53.3474	69.1227	0.597012	1.15083	24	56	wilcoxon	S
YIL132C	CSM2	0.933333	0.960153	4.21206	39.6356	51.1734	5.62047	1.81746	4	8	wilcoxon	S
YOR368W	RAD17	0.000632156	0.0102869	4.28127	55.3412	71.1855	0.956416	0.990267	24	56	wilcoxon	S
YCR032W	BPH1	0.214141	0.305429	4.39119	51.5325	66.2504	2.50041	1.51031	4	8	wilcoxon	S
YMR167W	MLH1	0.109091	0.177521	4.40585	55.8397	72.2745	0.946564	1.79009	4	8	wilcoxon	S
YLR135W	SLX4	0.0484848	0.0881095	4.55469	57.8058	75.7405	1.09991	2.48869	4	8	wilcoxon	S
YPL164C	MLH3	0.153535	0.241077	4.65457	58.6024	75.8994	0.897502	2.92013	4	8	wilcoxon	S
YKR056W	TRM2	0.214141	0.305429	4.66478	60.0525	78.0014	0.459563	2.82878	4	8	wilcoxon	S
YLL010C	PSR1	0.109091	0.177521	5.12901	57.0905	73.0349	0.487796	2.54939	4	8	wilcoxon	S
YNL293W	MSB3	0.109091	0.177521	5.1432	55.6479	72.1258	1.83627	2.18339	4	8	wilcoxon	S
YML028W	TSA1	0.0371552	0.0711314	5.19463	43.1211	53.3892	1.2677	2.25897	24	56	wilcoxon	S
YDR363W	ESC2	0.00808081	0.0191585	5.26899	50.5341	62.7366	0.777152	1.7456	4	8	wilcoxon	S
YKL175W	ZRT3	0.00263001	0.0113895	5.28215	51.4133	65.2832	0.980774	1.54941	24	56	wilcoxon	S
YIR039C	YPS6	0.00129111	0.0113895	5.30842	59.0708	73.672	0.752289	1.29983	24	56	wilcoxon	S
YGR231C	PHB2	0.00133918	0.0113895	5.40506	54.2321	68.9497	2.56879	1.1882	24	56	wilcoxon	S
YDR263C	DIN7	0.0484848	0.0881095	5.42268	56.4062	71.729	0.45749	1.68538	4	8	wilcoxon	S
YER179W	DMC1	0.282828	0.373626	5.44812	53.6318	67.7058	3.29717	0.860969	4	8	wilcoxon	S
YDR310C	SUM1	0.0161616	0.0338354	5.4566	48.8304	60.2562	0.542166	1.39132	4	8	wilcoxon	S
YHL002W	HSE1	0.367677	0.450782	5.4788	57.0227	71.0525	0.947889	3.45172	4	8	wilcoxon	S
YPL121C	MEI5	0.0282828	0.0556333	5.50844	57.2119	72.8058	0.653388	2.36071	4	8	wilcoxon	S
YBR228W	SLX1	0.0727273	0.12639	5.53251	60.4038	76.6591	1.15499	1.86001	4	8	wilcoxon	S
YJL047C	RTT101	0.00808081	0.0191585	5.64042	46.6332	56.716	1.07785	1.89087	4	8	wilcoxon	S
YPL001W	HAT1	2.13397e-06	5.87663e-05	5.79261	54.6243	67.5486	0.713012	0.812266	24	56	wilcoxon	S
YLR019W	PSR2	0.00808081	0.0191585	5.94654	56.4141	70.9376	0.987363	1.50085	4	8	wilcoxon	S
YOR144C	ELG1	0.0040404	0.0113895	5.95745	54.1892	68.5905	0.939414	1.60659	4	8	wilcoxon	S
YDR262W	YDR262W	2.13397e-06	5.87663e-05	5.97185	55.5872	69.9314	0.746142	0.925675	24	56	wilcoxon	S
YML058W	SML1	0.00808081	0.0191585	6.039	59.3677	73.9042	1.10021	2.06938	4	8	wilcoxon	S
YGL014W	PUF4	0.0282828	0.0556333	6.12225	59.5774	76.3322	0.981599	2.60804	4	8	wilcoxon	S
YHR030C	SLT2	0.214141	0.305429	6.13125	66.9627	85.3529	1.11443	3.28039	4	8	wilcoxon	S
YMR162C	DNF3	0.109091	0.177521	6.22717	61.1697	76.6567	0.981582	2.34077	4	8	wilcoxon	S
YBR274W	CHK1	2.73648e-05	0.000612288	6.22883	58.818	73.719	1.90378	0.866121	24	56	wilcoxon	S
YOR229W	WTM2	0.109091	0.177521	6.25457	59.8544	75.137	0.67032	3.38137	4	8	wilcoxon	S
YBR162W-A	YSY6	0.0161616	0.0338354	6.34696	57.7183	72.2746	0.816094	1.70219	4	8	wilcoxon	S
YDR099W	BMH2	0.0727273	0.12639	6.41369	59.9437	75.0605	1.41172	6.5503	4	8	wilcoxon	S
YIL139C	REV7	0.0161616	0.0338354	6.70037	60.3724	74.3159	1.46283	1.67214	4	8	wilcoxon	S
YOR191W	RIS1	0.214141	0.305429	6.7307	56.0513	70.091	1.06864	3.4901	4	8	wilcoxon	S
YGL086W	MAD1	0.0040404	0.0113895	6.8546	62.0828	78.0541	0.80355	1.85065	4	8	wilcoxon	S
YER120W	SCS2	0.0040404	0.0113895	6.88864	57.7714	72.1237	0.779513	1.09272	4	8	wilcoxon	S
YNL304W	YPT11	0.0040404	0.0113895	6.89054	57.7095	71.3397	0.311455	0.848146	4	8	wilcoxon	S
YNL051W	COG5	0.0484848	0.0881095	6.89578	50.4042	56.8739	2.74104	2.74981	4	8	wilcoxon	S
YNL215W	IES2	0.5451	0.635654	6.97282	26.7907	19.788	1.86668	9.18169	4	8	wilcoxon	S
YDL182W	LYS20	0.0161616	0.0338354	7.00852	54.4703	66.7742	0.971769	2.84242	4	8	wilcoxon	S
YJL024C	APS3	0.0161616	0.0338354	7.23132	63.1373	78.9353	1.13001	1.90961	4	8	wilcoxon	S
YOR346W	REV1	0.0040404	0.0113895	7.26629	60.5366	74.5783	0.492258	1.60674	4	8	wilcoxon	S
YDR414C	ERD1	0.0484848	0.0881095	7.30064	57.0623	69.8945	1.78423	2.428	4	8	wilcoxon	S
YOL062C	APM4	0.00808081	0.0191585	7.39439	61.6426	77.3071	1.47474	1.92128	4	8	wilcoxon	S
YGL021W	ALK1	0.0040404	0.0113895	7.40234	61.7676	76.4829	1.17115	0.623952	4	8	wilcoxon	S
YER041W	YEN1	0.0040404	0.0113895	7.44599	57.4474	69.636	0.646719	1.27743	4	8	wilcoxon	S
YDR483W	KRE2	0.00743034	0.0191585	7.44795	61.0281	75.3821	0.465426	2.53688	4	16	wilcoxon	S
YAL019W	FUN30	0.0040404	0.0113895	7.47321	56.5916	70.0425	1.92877	0.730115	4	8	wilcoxon	S
YIL103W	DPH1	0.0040404	0.0113895	7.48107	55.1439	66.6872	0.71839	1.83345	4	8	wilcoxon	S
YDL024C	DIA3	0.00808081	0.0191585	7.67781	61.3463	75.5064	1.05542	1.68479	4	8	wilcoxon	S
YGR209C	TRX2	0.0040404	0.0113895	7.71385	57.1713	69.582	0.445977	1.57423	4	8	wilcoxon	S
YHR134W	WSS1	0.0040404	0.0113895	7.77013	46.4936	54.6086	0.628102	2.94311	4	8	wilcoxon	S
YDR371W	CTS2	0.0040404	0.0113895	7.84761	56.7941	69.5323	0.903223	1.78652	4	8	wilcoxon	S
YOL071W	EMI5	1.11367e-05	0.000265797	7.96763	59.6123	70.9185	0.779033	1.39609	24	56	wilcoxon	S
YOR094W	ARF3	0.0161616	0.0338354	8.02423	58.3099	71.0731	0.489078	2.75515	4	8	wilcoxon	S
YER020W	GPA2	0.214141	0.305429	8.09066	45.9939	53.2053	1.07901	3.99034	4	8	wilcoxon	S
YKL025C	PAN3	0.569697	0.645416	8.12287	59.9156	70.7549	15.2147	2.76603	4	8	wilcoxon	S
YDL059C	RAD59	0.0282828	0.0556333	8.157	57.1548	68.9353	3.26601	1.9328	4	8	wilcoxon	S
YBR233W	PBP2	0.0727273	0.12639	8.2393	61.105	74.2977	1.02646	2.67861	4	8	wilcoxon	S
YMR156C	TPP1	0.0040404	0.0113895	8.37078	60.6379	71.9654	1.44884	1.11786	4	8	wilcoxon	S
YAL026C	DRS2	0.0161616	0.0338354	8.37212	50.351	58.3628	1.52212	2.13619	4	8	wilcoxon	S
YLR035C	MLH2	0.00808081	0.0191585	8.42285	59.8557	72.0132	0.71541	1.73325	4	8	wilcoxon	S
YGL213C	SKI8	0.0040404	0.0113895	8.47812	50.7012	59.6984	1.0861	1.44301	4	8	wilcoxon	S
YKL114C	APN1	0.0161616	0.0338354	8.53416	59.1624	70.6732	0.785923	3.9004	4	8	wilcoxon	S
YMR039C	SUB1	0.0040404	0.0113895	8.55817	55.0352	65.3888	0.657392	1.37184	4	8	wilcoxon	S
YDL230W	PTP1	0.0040404	0.0113895	8.58672	57.5296	68.8917	1.75038	1.0775	4	8	wilcoxon	S
YHR204W	MNL1	0.00808081	0.0191585	8.59915	60.7827	72.3452	0.986244	2.24867	4	8	wilcoxon	S
YBR034C	HMT1	0.0040404	0.0113895	8.71238	54.5701	65.4053	2.71839	1.27951	4	8	wilcoxon	S
YGL094C	PAN2	0.214141	0.305429	8.7608	59.4619	69.9766	1.50005	4.59756	4	8	wilcoxon	S
YDL070W	BDF2	0.0040404	0.0113895	8.82109	54.5364	63.3964	1.33523	1.24938	4	8	wilcoxon	S
YCL011C	GBP2	0.0040404	0.0113895	8.95146	56.7321	66.4486	1.39242	1.64587	4	8	wilcoxon	S
YNL246W	VPS75	0.0040404	0.0113895	9.00146	47.9052	56.0461	0.993128	1.10517	4	8	wilcoxon	S
YOR033C	EXO1	0.000118757	0.00236195	9.05198	60.3844	72.4676	0.495892	3.81796	24	56	wilcoxon	S
YPL167C	REV3	0.0040404	0.0113895	9.05665	61.1573	72.2806	0.748822	1.78514	4	8	wilcoxon	S
YML030W	RCF1	1.02095e-08	3.65499e-07	9.0811	57.4527	67.0978	0.961936	0.918065	24	56	wilcoxon	S
YPL022W	RAD1	0.00808081	0.0191585	9.08442	47.1132	55.3252	1.50812	2.26068	4	8	wilcoxon	S
YDR419W	RAD30	0.0040404	0.0113895	9.1183	58.119	70.6311	1.39347	1.74829	4	8	wilcoxon	S
YGL019W	CKB1	0.0040404	0.0113895	9.21046	48.5147	54.6314	0.619744	1.4519	4	8	wilcoxon	S
YDR481C	PHO8	0.00808081	0.0191585	9.22303	59.4565	70.6388	0.329114	2.19355	4	8	wilcoxon	S
YJR052W	RAD7	0.0040404	0.0113895	9.37844	60.2623	71.3226	0.760736	1.88323	4	8	wilcoxon	S
YDR217C	RAD9	2.12844e-08	6.92711e-07	9.44111	59.8915	71.7983	0.998899	1.20959	24	56	wilcoxon	S
YMR190C	SGS1	0.0484848	0.0881095	9.71801	48.7514	55.299	1.11818	3.32054	4	8	wilcoxon	S
YCR021C	HSP30	0.0040404	0.0113895	9.87193	60.0247	72.672	1.27372	2.37397	4	8	wilcoxon	S
YDR395W	SXM1	0.0040404	0.0113895	9.97992	60.4677	70.8013	0.91712	1.74773	4	8	wilcoxon	S
YOR386W	PHR1	0.0040404	0.0113895	10.01	59.8345	68.4898	1.28143	1.30698	4	8	wilcoxon	S
YDR289C	RTT103	0.0040404	0.0113895	10.2008	61.5991	72.1528	0.751325	1.35531	4	8	wilcoxon	S
YBR272C	HSM3	0.0040404	0.0113895	10.3111	55.4164	63.2496	1.09175	1.49773	4	8	wilcoxon	S
YJR110W	YMR1	0.0040404	0.0113895	10.4682	61.2343	73.8529	0.889712	1.65439	4	8	wilcoxon	S
YKL065C	YET1	0.0040404	0.0113895	10.5207	57.0421	66.2327	1.12366	1.68473	4	8	wilcoxon	S
YOR026W	BUB3	0.0040404	0.0113895	10.5748	31.0298	29.9676	1.43101	4.03002	4	8	wilcoxon	S
YBR092C	PHO3	0.109091	0.177521	10.5994	55.7952	63.8755	1.0116	3.45871	4	8	wilcoxon	S
YGR261C	APL6	0.0040404	0.0113895	10.7041	62.4315	71.4651	1.02701	2.48292	4	8	wilcoxon	S
YBL032W	HEK2	0.0040404	0.0113895	10.8732	52.5781	57.8748	1.12704	1.12294	4	8	wilcoxon	S
YGL241W	KAP114	0.0040404	0.0113895	10.992	58.4649	67.0649	0.521588	0.698396	4	8	wilcoxon	S
YMR201C	RAD14	0.0040404	0.0113895	10.9977	55.461	62.9417	1.75312	2.15901	4	8	wilcoxon	S
YJL154C	VPS35	0.0040404	0.0113895	11.0007	50.3878	57.1657	1.34554	2.73824	4	8	wilcoxon	S
YMR152W	YIM1	0.0040404	0.0113895	11.2036	59.1742	68.0828	1.19216	2.35851	4	8	wilcoxon	S
YPL232W	SSO1	0.0040404	0.0113895	11.3688	59.6395	70.3498	1.72526	2.21572	4	8	wilcoxon	S
YGR142W	BTN2	0.0040404	0.0113895	11.5117	60.4889	68.8128	0.724575	2.56114	4	8	wilcoxon	S
YLR043C	TRX1	0.00808081	0.0191585	11.522	57.6086	64.8394	0.948371	2.74248	4	8	wilcoxon	S
YLR170C	APS1	0.0040404	0.0113895	11.5234	57.8072	65.7372	0.734995	0.777427	4	8	wilcoxon	S
YLR268W	SEC22	0.214141	0.305429	11.5672	45.1054	47.1851	0.581881	4.33053	4	8	wilcoxon	S
YBL019W	APN2	0.0040404	0.0113895	11.6395	57.2918	65.4176	1.23774	1.81259	4	8	wilcoxon	S
YGL090W	LIF1	0.0040404	0.0113895	11.7429	58.394	65.3809	1.16478	2.0991	4	8	wilcoxon	S
YKL067W	YNK1	0.0040404	0.0113895	11.8052	60.8795	69.888	1.71214	0.769939	4	8	wilcoxon	S
YGL175C	SAE2	0.0282828	0.0556333	11.8697	57.5725	65.2324	2.20892	4.27373	4	8	wilcoxon	S
YDR072C	IPT1	0.0040404	0.0113895	12.0216	57.8187	63.9523	0.841799	1.78865	4	8	wilcoxon	S
YER166W	DNF1	0.0040404	0.0113895	12.1351	59.2211	65.8518	0.534735	3.25265	4	8	wilcoxon	S
YIL035C	CKA1	0.0040404	0.0113895	12.144	57.9108	64.0902	0.658267	2.18067	4	8	wilcoxon	S
YJR005W	APL1	0.0040404	0.0113895	12.2408	60.5897	67.8606	0.463321	2.15627	4	8	wilcoxon	S
YHR004C	NEM1	0.0040404	0.0113895	12.2584	57.5939	64.4278	1.22084	1.65311	4	8	wilcoxon	S
YJR066W	TOR1	0.0040404	0.0113895	12.2847	60.7493	68.185	1.29146	0.840914	4	8	wilcoxon	S
YPL194W	DDC1	0.0040404	0.0113895	12.3222	61.7516	70.1004	0.967044	1.28452	4	8	wilcoxon	S
YJL044C	GYP6	0.0040404	0.0113895	13.2236	59.8956	65.9252	0.935729	4.16227	4	8	wilcoxon	S
YDR030C	RAD28	0.0040404	0.0113895	13.262	64.3798	71.775	1.61432	1.46227	4	8	wilcoxon	S
YDR097C	MSH6	0.0040404	0.0113895	13.9833	60.9248	64.0425	1.74253	1.98815	4	8	wilcoxon	S
YMR183C	SSO2	0.0040404	0.0113895	14.2338	52.7693	53.7531	0.493412	1.15965	4	8	wilcoxon	S
YCR088W	ABP1	0.0040404	0.0113895	14.7734	55.6617	61.0621	1.51809	1.24676	4	8	wilcoxon	S
YLL041C	SDH2	0.0040404	0.0113895	15.1966	57.9179	60.8931	0.710494	4.6247	4	8	wilcoxon	S
YOL043C	NTG2	0.0040404	0.0113895	15.2728	62.1724	64.8243	1.03741	0.757236	4	8	wilcoxon	S
YJL095W	BCK1	0.0040404	0.0113895	15.7266	67.7098	73.6754	1.34746	1.81841	4	8	wilcoxon	S
YBL079W	NUP170	0.0040404	0.0113895	15.7781	54.6105	55.1246	0.71788	2.33235	4	8	wilcoxon	S
YJL053W	PEP8	0.0040404	0.0113895	16.1402	52.2764	50.1982	1.30781	1.71739	4	8	wilcoxon	S
YER116C	SLX8	0.0040404	0.0113895	16.1513	47.6397	44.2244	1.35084	2.02859	4	8	wilcoxon	S
YJL030W	MAD2	0.109091	0.177521	16.1881	47.431	43.9559	3.36437	10.9519	4	8	wilcoxon	S
YKL213C	DOA1	0.0040404	0.0113895	16.4553	40.5983	34.1591	0.805421	4.61991	4	8	wilcoxon	S
YFL031W	HAC1	0.0040404	0.0113895	16.593	59.8997	60.4073	0.825981	0.880237	4	8	wilcoxon	S
YLR330W	CHS5	0.0040404	0.0113895	16.8937	51.8227	49.3852	1.34569	1.11268	4	8	wilcoxon	S
YLR377C	FBP1	0.0040404	0.0113895	17.9802	62.2679	62.3085	1.23055	2.39378	4	8	wilcoxon	S
YIL149C	MLP2	0.0040404	0.0113895	18.4748	61.271	59.8088	1.34114	2.63028	4	8	wilcoxon	S
YKL109W	HAP4	7.81398e-11	3.10823e-09	18.9977	54.478	48.5789	1.15147	1.39153	24	56	wilcoxon	S
YDL077C	VAM6	0.0040404	0.0113895	19.5209	45.264	34.8188	1.03424	6.5063	4	8	wilcoxon	S
YOR039W	CKB2	0.20194	0.305429	19.7243	46.2298	39.8651	0.9873	11.0849	4	8	wilcoxon	S
YHR079C	IRE1	0.0040404	0.0113895	20.1122	59.9361	56.3405	0.709174	3.00493	4	8	wilcoxon	S
YOR106W	VAM3	0.0503943	0.091117	20.8229	29.7554	14.0125	4.26477	6.53964	4	8	wilcoxon	S
YJR001W	AVT1	0.0040404	0.0113895	21.2444	60.3022	54.537	1.21814	3.64096	4	8	wilcoxon	S
YNR006W	VPS27	0.00495261	0.0138518	21.4904	22.0146	0	2.59153	0.669764	4	8	wilcoxon	S
YOL112W	MSB4	0.0040404	0.0113895	21.6483	56.7471	47.8377	0.981445	7.72814	4	8	wilcoxon	S
YBR106W	PHO88	0.00836037	0.0195622	22.6169	52.9872	42.7638	1.73165	7.91094	4	8	wilcoxon	S
YDR080W	VPS41	0.282828	0.373626	23.3606	27.6683	3.64072	8.05397	6.2298	4	8	wilcoxon	S
YHL020C	OPI1	0.0040404	0.0113895	24.3147	46.7112	30.9901	1.67401	3.89577	4	8	wilcoxon	S
YPR164W	MMS1	0.0040404	0.0113895	27.7245	61.0597	46.7587	1.07936	1.1998	4	8	wilcoxon	S
YNL136W	EAF7	0.0040404	0.0113895	30.8629	57.8297	36.486	2.28543	2.40645	4	8	wilcoxon	S
YGR208W	SER2	0.0040404	0.0113895	32.6348	57.8687	39.0516	2.17243	8.39014	4	8	wilcoxon	S
YKL139W	CTK1	0.214141	0.305429	33.2374	36.1285	2.71589	1.03415	10.1778	4	8	wilcoxon	S
YDL226C	GCS1	0.00332919	0.0113895	41.567	41.6393	0	0.890723	0.149135	4	8	wilcoxon	S

## Sheet: VPS74 YKU70 screen
QFA results for vps74Δ yku70Δ at 37°C
query strain: vps74Δ yku70Δ
control strain: lyp1Δ
GI: Genetic interaction (E: enhancer; S: suppressor)
GIS: Genetic interaction score
significant genetic interaction threshold: q<0.05
Query/control fitness: mean fitness (MDR x MDP) per genotype
Query SE/control SE: Calculated standart error of the mean fitness
Query count/control count: number of growth curves analysed per genotype
R package version: 0.0-44
#########################################################
ORF	Gene	P	Q	GIS	QueryFitnessSummary	ControlFitnessSummary	QuerySE	ControlSE	QueryCount	ControlCount	TestType	Type
YBL088C	TEL1	4.54352e-07	3.53605e-06	-84.5155	0	88.6739	0	5.012	8	8	t-test	E
YMR283C	RIT1	2.59145e-09	3.56822e-08	-83.5755	0	87.6877	0	2.35127	8	8	t-test	E
YDR372C	VPS74	1.01956e-06	6.51789e-06	-82.4953	0	86.5543	0	5.50517	8	8	t-test	E
YHR030C	SLT2	2.33639e-09	3.34571e-08	-77.4695	6.54355	88.1468	4.28662	3.28039	8	8	t-test	E
YBL047C	EDE1	2.208e-09	3.2936e-08	-73.3181	0	76.9256	0	2.01585	8	8	t-test	E
YHR077C	NMD2	4.05293e-46	2.41825e-44	-72.9105	0.680478	77.2119	0.189358	1.67761	48	56	t-test	E
YDL155W	CLB3	1.04755e-11	2.50015e-10	-72.831	1.40882	77.8926	0.939564	2.04244	8	8	t-test	E
YPR023C	EAF3	9.36237e-08	8.82034e-07	-71.9445	0.185243	75.6788	0.185243	3.42468	8	8	t-test	E
YPR119W	CLB2	1.00002e-54	2.42512e-52	-71.5946	1.60416	76.8003	0.762403	1.65571	48	56	t-test	E
YDR373W	FRQ1	7.10665e-12	1.81727e-10	-71.2459	0.789438	75.5797	0.387704	1.32405	8	8	t-test	E
YDL065C	PEX19	7.88366e-07	5.35076e-06	-70.8596	16.1643	91.3058	6.11799	3.3747	8	8	t-test	E
YAL002W	VPS8	1.69144e-05	6.51115e-05	-70.4552	0	73.9219	0	7.13388	8	8	t-test	E
YLR015W	BRE2	2.13098e-07	1.81641e-06	-70.3092	1.31029	75.1434	0.562804	3.95634	8	8	t-test	E
YGR100W	MDR1	1.32616e-08	1.63713e-07	-68.4212	10.3865	82.6853	4.10644	2.51269	8	8	t-test	E
YDR386W	MUS81	1.65513e-06	1.0043e-05	-68.3443	9.70605	81.8907	6.38016	6.1198	8	8	t-test	E
YAR003W	SWD1	2.59345e-05	9.28455e-05	-67.7506	0.403884	71.5079	0.28109	7.33689	8	8	t-test	E
YJL095W	BCK1	5.27005e-09	6.73813e-08	-67.5582	3.45177	74.5039	3.45177	1.81841	8	8	t-test	E
YBL003C	HTA2	1.34803e-05	5.48403e-05	-66.8274	19.9399	91.0365	7.53834	3.44725	8	8	t-test	E
YNL154C	YCK2	7.92151e-07	5.35076e-06	-66.7612	10.9983	81.5855	4.85641	1.53059	8	8	t-test	E
YMR048W	CSM3	3.55106e-06	1.87991e-05	-65.758	18.0426	87.9238	6.46783	3.17602	8	8	t-test	E
YDR371W	CTS2	2.03944e-09	3.17443e-08	-65.7217	0	68.9554	0	1.78652	8	8	t-test	E
YBL051C	PIN4	5.8176e-11	1.22512e-09	-64.4134	5.31048	73.1545	2.68976	2.47337	8	8	t-test	E
YIL084C	SDS3	1.48271e-07	1.32702e-06	-64.0424	0	67.1935	0	3.22767	8	8	t-test	E
YDL109C	YDL109C	1.02978e-53	1.22887e-51	-64.0373	3.692	71.0618	1.44344	1.54229	48	56	t-test	E
YML112W	CTK3	6.58042e-08	6.77316e-07	-63.9296	13.6858	81.4344	4.60719	3.16783	8	8	t-test	E
YBR114W	RAD16	7.91809e-08	7.8741e-07	-63.8106	10.7776	78.2582	4.32697	2.33473	8	8	t-test	E
YNL085W	MKT1	1.86451e-06	1.11249e-05	-63.4012	13.2186	80.3897	5.2222	1.75311	8	8	t-test	E
YDR057W	YOS9	1.20194e-09	1.95588e-08	-62.7465	1.76015	67.6806	0.858992	2.41401	8	8	t-test	E
YLR265C	NEJ1	1.73058e-05	6.53941e-05	-62.5411	19.8142	86.4074	7.50541	4.13898	8	8	t-test	E
YLR032W	RAD5	6.66449e-07	4.77178e-06	-62.333	11.7215	77.6982	4.4776	5.82168	8	8	t-test	E
YDR440W	DOT1	1.55308e-10	3.0889e-09	-61.6918	3.78801	68.7016	2.65199	1.86299	8	8	t-test	E
YDR269C	YDR269C	1.35482e-54	2.42512e-52	-61.2772	7.18068	71.8262	1.39597	1.33257	48	56	t-test	E
YNR059W	MNT4	3.03516e-19	9.05489e-18	-61.2567	11.0129	75.8255	4.31459	1.27962	48	56	t-test	E
YNL201C	PSY2	3.77194e-07	3.06899e-06	-60.9518	10.2168	74.6703	4.51717	1.99311	8	8	t-test	E
YNL307C	MCK1	4.7048e-10	8.27976e-09	-60.9362	2.61734	66.6806	2.61734	1.52941	8	8	t-test	E
YOR279C	RFM1	3.57079e-06	1.87991e-05	-60.565	19.62	84.1304	5.83813	2.64221	8	8	t-test	E
YOR382W	FIT2	7.52196e-51	6.73216e-49	-60.5385	8.79363	72.7435	1.50671	1.12253	48	56	t-test	E
YBR009C	HHF1	1.85533e-08	2.21402e-07	-60.3763	9.9172	73.7522	3.72998	3.96198	8	8	t-test	E
YNL107W	YAF9	9.1418e-06	3.99118e-05	-60.0692	17.065	80.9295	6.13526	2.19538	8	8	t-test	E
YDR369C	XRS2	8.80361e-08	8.51809e-07	-59.9693	0.535194	63.4815	0.352644	2.9332	8	8	t-test	E
YGL087C	MMS2	5.8231e-06	2.74299e-05	-59.9671	20.4745	84.3996	6.07587	2.67364	8	8	t-test	E
YGL058W	RAD6	2.50864e-05	9.07165e-05	-59.83	18.2954	81.9694	7.01155	2.62764	8	8	t-test	E
YLR376C	PSY3	5.88678e-05	0.000186501	-59.545	21.7047	85.2474	7.73069	2.73932	8	8	t-test	E
YBR288C	APM3	8.78192e-07	5.82209e-06	-59.4861	12.0803	75.0876	4.63633	1.775	8	8	t-test	E
YLR394W	CST9	4.86731e-05	0.000161342	-59.2034	14.6655	77.5035	7.95718	4.23834	8	8	t-test	E
YMR273C	ZDS1	3.58706e-05	0.000124677	-59.1783	13.6513	76.413	6.78705	1.55057	8	8	t-test	E
YJL187C	SWE1	3.46682e-06	1.87991e-05	-59.1231	15.2394	78.0213	5.76975	2.77556	8	8	t-test	E
YMR137C	PSO2	6.85011e-06	3.18486e-05	-59.0567	15.2696	77.9833	5.88439	2.21865	8	8	t-test	E
YMR285C	NGL2	1.98516e-10	3.74046e-09	-59.0303	0	61.9348	0	1.14922	8	8	t-test	E
YHL002W	HSE1	1.72066e-07	1.50243e-06	-59.0031	12.2258	74.7336	4.68231	3.45172	8	8	t-test	E
YNL030W	HHF2	1.28963e-06	8.09976e-06	-58.3484	8.2922	69.9195	4.21815	0.958374	8	8	t-test	E
YMR078C	CTF18	5.5377e-08	6.00757e-07	-58.0627	0.187014	61.1158	0.187014	2.58298	8	8	t-test	E
YMR186W	HSC82	2.37334e-07	1.97595e-06	-57.7729	10.7246	71.8678	4.12824	1.89679	8	8	t-test	E
YKL113C	RAD27	3.13166e-06	1.72482e-05	-57.7453	0.32984	60.9326	0.32984	4.59681	8	8	t-test	E
YNL325C	FIG4	4.10771e-07	3.26791e-06	-57.48	9.14479	69.9029	4.23701	1.79223	8	8	t-test	E
YMR284W	YKU70	4.85684e-10	8.27976e-09	-57.4765	0	60.3046	0	1.27192	8	8	t-test	E
YOR189W	IES4	1.18596e-05	4.99499e-05	-57.3427	16.4875	77.4628	5.94359	1.93518	8	8	t-test	E
YJR035W	RAD26	6.6218e-08	6.77316e-07	-57.3298	9.15726	69.7584	4.15675	3.75576	8	8	t-test	E
YMR119W	ASI1	5.54483e-06	2.64673e-05	-56.9862	18.5934	79.2984	5.53101	2.02285	8	16	t-test	E
YCR092C	MSH3	7.85841e-07	5.35076e-06	-56.5921	11.8915	71.8532	4.73844	2.36163	8	8	t-test	E
YMR307W	GAS1	2.84105e-06	1.58921e-05	-56.5341	1.76438	61.167	0.452468	4.48505	8	8	t-test	E
YLR373C	VID22	5.13393e-08	5.74358e-07	-55.9974	10.5395	69.8107	4.0225	3.26981	8	8	t-test	E
YHR031C	RRM3	4.21793e-06	2.18844e-05	-55.908	12.3715	71.6391	5.5645	2.65103	8	8	t-test	E
YBR022W	POA1	4.683e-06	2.33233e-05	-55.4124	13.6176	72.4265	5.30861	2.0661	8	8	t-test	E
YDR496C	PUF6	6.0625e-50	4.34075e-48	-55.235	0.813699	58.8065	0.204016	1.13832	48	56	t-test	E
YDR395W	SXM1	9.75381e-06	4.20706e-05	-54.8834	12.175	70.3579	5.51677	1.74773	8	8	t-test	E
YBR082C	UBC4	3.35693e-08	3.87671e-07	-54.824	12.1593	70.2791	3.91438	2.54284	8	16	t-test	E
YNL250W	RAD50	1.57007e-31	6.2454e-30	-54.5826	0.576283	57.8729	0.249407	2.03758	48	48	t-test	E
YDR310C	SUM1	5.17172e-09	6.73813e-08	-54.4199	3.607	60.882	2.72704	1.39132	8	8	t-test	E
YMR173W	DDR48	2.02247e-06	1.18696e-05	-54.381	13.3231	71.0353	4.80453	2.01205	8	8	t-test	E
YDR004W	RAD57	6.46169e-07	4.72099e-06	-54.1734	11.756	69.1732	4.73782	2.98149	8	8	t-test	E
YLR436C	ECM30	1.73532e-05	6.53941e-05	-53.7255	18.0093	75.2643	5.41293	0.926396	8	8	t-test	E
YML032C	RAD52	3.98796e-36	2.03956e-34	-53.1091	1.96702	57.7861	0.402477	1.95032	48	56	t-test	E
YDL074C	BRE1	3.06855e-11	6.86588e-10	-53.0856	0	55.6976	0	3.26132	8	16	t-test	E
YML021C	UNG1	5.18719e-05	0.00016882	-52.5731	11.1692	66.8786	6.14117	0.810416	8	8	t-test	E
YDR414C	ERD1	2.08632e-05	7.70004e-05	-52.2857	16.0227	71.6694	6.06016	2.428	8	8	t-test	E
YDR075W	PPH3	3.8494e-05	0.000128793	-51.7756	15.8416	70.9442	6.03928	1.47283	8	8	t-test	E
YER019C-A	SBH2	7.7357e-05	0.000232721	-51.4259	22.0861	77.129	6.54197	1.36857	8	8	t-test	E
YDR030C	RAD28	7.35607e-05	0.000225083	-51.3204	17.1827	71.8736	6.51736	1.46227	8	8	t-test	E
YOR346W	REV1	0.000219248	0.000568775	-51.1965	20.1304	74.8364	7.61654	1.60674	8	8	t-test	E
YEL037C	RAD23	0.000167138	0.00044989	-51.1675	19.5409	74.1875	7.40033	1.86018	8	8	t-test	E
YPL121C	MEI5	9.11276e-05	0.000267407	-50.911	18.4225	72.745	6.96887	2.36071	8	8	t-test	E
YNL032W	SIW14	5.85399e-05	0.000186501	-50.9046	9.6922	63.5783	6.04891	0.773383	8	8	t-test	E
YLR087C	CSF1	4.72269e-06	2.33233e-05	-50.8332	0	53.3344	0	4.25222	8	8	t-test	E
YJR082C	EAF6	6.10219e-05	0.000189964	-50.6946	17.5594	71.6123	6.57384	2.23348	8	8	t-test	E
YMR156C	TPP1	0.000171674	0.000455255	-50.6038	18.835	72.8554	7.14295	1.11786	8	8	t-test	E
YBR098W	MMS4	1.61501e-05	6.3101e-05	-50.5178	18.4362	72.3467	5.99465	3.22854	8	8	t-test	E
YBL091C-A	SCS22	9.41546e-05	0.000274043	-50.1285	16.1515	69.5413	6.71177	1.80679	8	8	t-test	E
YDR072C	IPT1	7.01259e-06	3.2186e-05	-49.8807	12.5006	65.4507	4.93971	1.78865	8	8	t-test	E
YGR231C	PHB2	5.06133e-28	1.64723e-26	-49.7031	17.5716	70.5849	2.43395	1.1882	48	56	t-test	E
YHR167W	THP2	3.17737e-05	0.000111519	-49.5982	9.58355	62.0937	3.22608	6.65812	8	8	t-test	E
YER095W	RAD51	9.27445e-07	6.03682e-06	-49.3322	11.0945	63.4	4.05384	1.79841	8	8	t-test	E
YGR261C	APL6	5.14572e-05	0.00016882	-48.9243	17.706	69.9087	6.33574	2.48292	8	8	t-test	E
YJL115W	ASF1	2.15529e-06	1.2445e-05	-48.9061	0.444092	51.7784	0.32407	3.70703	8	8	t-test	E
YBR092C	PHO3	8.54887e-06	3.77839e-05	-48.6272	14.4316	66.1615	5.50111	3.45871	8	8	t-test	E
YPL127C	HHO1	0.000147556	0.000409497	-48.5581	18.2942	70.1417	6.80764	1.44819	8	8	t-test	E
YOR191W	RIS1	2.05541e-05	7.66495e-05	-48.4311	20.8615	72.702	5.96773	3.4901	8	8	t-test	E
YML028W	TSA1	1.32724e-31	5.93938e-30	-48.2684	6.94805	57.9333	1.8283	2.25897	48	56	t-test	E
YKL114C	APN1	7.69834e-05	0.000232721	-47.9776	18.0933	69.3218	6.84476	3.9004	8	8	t-test	E
YHL006C	SHU1	0.00104854	0.0025025	-47.8766	23.8309	75.2357	9.15678	2.10948	8	8	t-test	E
YKL175W	ZRT3	2.19775e-28	7.86796e-27	-47.8153	17.6732	68.7107	2.38138	1.54941	48	56	t-test	E
YPL232W	SSO1	7.94695e-05	0.000237084	-47.5213	16.8872	67.5776	6.40257	2.21572	8	8	t-test	E
YCR032W	BPH1	1.62159e-05	6.3101e-05	-47.474	16.2416	66.8506	5.05239	1.51031	8	8	t-test	E
YDL059C	RAD59	0.00027614	0.000706131	-47.3414	19.5442	70.1765	7.40087	1.9328	8	8	t-test	E
YKL076C	PSY1	2.7223e-05	9.64935e-05	-47.1027	15.4619	65.643	5.84723	2.86964	8	8	t-test	E
YER162C	RAD4	1.41113e-05	5.67624e-05	-46.6237	9.04962	58.4127	4.67735	1.05017	8	8	t-test	E
YGR086C	PIL1	0.000148778	0.000409713	-46.4631	17.9638	67.5969	6.54251	1.45565	8	8	t-test	E
YMR167W	MLH1	4.75588e-06	2.33233e-05	-45.8026	24.7959	74.0722	4.43559	1.79009	8	8	t-test	E
YMR039C	SUB1	6.03315e-05	0.000189462	-45.7196	15.9127	64.6648	5.68019	1.37184	8	8	t-test	E
YDR363W-A	SEM1	0.00150541	0.00354564	-45.6605	17.1301	65.8801	9.49065	3.75853	8	8	t-test	E
YHR108W	GGA2	0.00190206	0.00439314	-45.1391	15.1949	63.3025	9.47944	1.75924	8	8	t-test	E
YLL002W	RTT109	2.259e-06	1.28369e-05	-44.6915	7.25274	54.5	4.33954	2.47892	8	8	t-test	E
YLR320W	MMS22	1.5216e-06	9.39197e-06	-44.1484	3.63931	50.139	3.4364	4.42549	8	8	t-test	E
YOL013C	HRD1	1.27476e-05	5.30657e-05	-43.7375	28.006	75.2735	4.8779	2.1793	8	8	t-test	E
YBR272C	HSM3	0.000143161	0.000400403	-43.5926	16.7923	63.356	6.14645	1.49773	8	8	t-test	E
YNL128W	TEP1	1.49218e-05	5.93556e-05	-43.4979	20.3214	66.9595	4.5173	1.24113	8	8	t-test	E
YDL070W	BDF2	0.000170574	0.000455255	-43.2319	17.1179	63.3192	6.17501	1.24938	8	8	t-test	E
YJL154C	VPS35	5.46336e-07	4.07476e-06	-43.0174	9.99367	55.6194	3.7804	2.73824	8	8	t-test	E
YHR012W	VPS29	1.32709e-05	5.46091e-05	-43.0154	8.30838	53.8491	4.95468	2.54937	8	8	t-test	E
YJL094C	KHA1	1.08789e-07	9.98631e-07	-42.914	21.2308	67.301	6.84559	0.694388	48	56	t-test	E
YEL064C	AVT2	0.00986152	0.0206458	-42.4533	12.3533	57.5033	6.03913	12.6142	8	8	t-test	E
YCR088W	ABP1	5.2608e-05	0.000169673	-42.3823	15.0216	60.2283	5.16308	1.24676	8	8	t-test	E
YOR027W	STI1	0.00354194	0.00782724	-42.3221	24.7524	70.3748	9.88524	1.31276	8	8	t-test	E
YCL001W	RER1	0.0113315	0.0233142	-42.2921	21.2261	66.6435	12.4394	1.61324	8	8	t-test	E
YDR097C	MSH6	0.000150506	0.000411308	-42.246	20.8058	66.1541	6.16439	1.98815	8	8	t-test	E
YGL168W	HUR1	3.73213e-05	0.000127248	-41.8888	0	43.9499	0	4.78416	8	8	t-test	E
YIL153W	RRD1	0.000103074	0.000295204	-41.4226	7.06481	50.8732	5.76733	1.95538	8	8	t-test	E
YBR175W	SWD3	0.000740974	0.00180455	-41.3538	0.879013	44.3108	0.450912	7.64223	8	8	t-test	E
YJR058C	APS2	0.00228103	0.00516841	-41.18	20.8274	65.0584	8.9977	2.22493	8	8	t-test	E
YLR150W	STM1	8.52483e-05	0.000252222	-40.9847	24.4228	68.6258	5.74696	2.49204	8	8	t-test	E
YER020W	GPA2	7.93379e-06	3.56886e-05	-40.973	12.3679	55.9655	4.51039	3.99034	8	8	t-test	E
YGL163C	RAD54	4.84754e-06	2.34516e-05	-40.6572	10.7108	53.8955	3.6585	1.04971	8	8	t-test	E
YIL132C	CSM2	4.62435e-06	2.33233e-05	-40.2943	7.70804	50.3642	4.00453	1.81746	8	8	t-test	E
YLR268W	SEC22	7.97511e-06	3.56886e-05	-40.2858	10.0578	52.8206	4.19243	4.33053	8	8	t-test	E
YKL032C	IXR1	0.00123831	0.00293586	-40.0416	21.1799	64.2338	7.90012	1.98862	8	8	t-test	E
YBL032W	HEK2	0.000347959	0.00087725	-39.5276	16.5193	58.8046	6.26512	1.12294	8	8	t-test	E
YLR387C	REH1	1.16461e-05	4.96347e-05	-39.4951	33.5319	76.6202	7.8831	2.28832	48	56	t-test	E
YCL011C	GBP2	0.00185497	0.00431221	-39.1842	24.6308	66.9549	8.20967	1.64587	8	8	t-test	E
YDL040C	NAT1	0.000297476	0.000755295	-39.0328	34.2053	76.8417	9.95223	1.07919	48	56	t-test	E
YOL095C	HMI1	5.22846e-07	3.98253e-06	-38.8782	15.6972	57.2607	3.39594	2.40352	8	8	t-test	E
YNL246W	VPS75	0.00055763	0.00136734	-38.7633	13.6378	54.9794	6.60804	1.10517	8	8	t-test	E
YDR225W	HTA1	0.00166986	0.00390726	-38.4109	23.3236	64.772	8.14811	3.80158	8	8	t-test	E
YPL022W	RAD1	0.000102347	0.000295204	-38.1946	14.0972	54.8647	5.45182	2.26068	8	8	t-test	E
YER041W	YEN1	0.000906299	0.00217755	-38.0878	28.8134	70.1929	7.04881	1.27743	8	8	t-test	E
YBR073W	RDH54	3.80157e-05	0.000128393	-37.961	14.2825	54.814	4.98197	2.76807	8	8	t-test	E
YDR076W	RAD55	0.002905	0.00649993	-37.9297	21.7329	62.5983	8.68026	2.47883	8	8	t-test	E
YPR135W	CTF4	6.41575e-05	0.000198003	-37.803	0	39.6631	0	4.69377	8	8	t-test	E
YGL019W	CKB1	0.000135022	0.000380613	-37.4215	14.4931	54.469	5.28771	1.4519	8	8	t-test	E
YBR093C	PHO5	2.37092e-05	8.66111e-05	-36.7402	18.0414	57.477	4.63602	3.05675	8	8	t-test	E
YCL016C	DCC1	0.000259046	0.000667183	-36.6616	18.6543	58.0377	6.05055	3.42542	8	8	t-test	E
YBR289W	SNF5	0.013025	0.026494	-36.3805	0	38.1705	0	11.5482	8	8	t-test	E
YNL273W	TOF1	0.0122817	0.0251249	-35.8414	10.409	48.526	6.83309	10.6317	8	8	t-test	E
YJL030W	MAD2	0.0110815	0.0229317	-35.7279	0.401364	37.9069	0.401364	10.9519	8	8	t-test	E
YMR183C	SSO2	0.000161958	0.000439251	-35.6835	15.4042	53.6013	5.09704	1.15965	8	8	t-test	E
YMR190C	SGS1	0.000405301	0.00100762	-34.8299	18.2933	55.737	6.07975	3.32054	8	8	t-test	E
YDL042C	SIR2	0.0178557	0.035513	-34.8093	0	36.522	0	11.864	8	8	t-test	E
YLR330W	CHS5	0.000127379	0.000361918	-33.8168	12.3357	48.4233	4.67739	1.11268	8	8	t-test	E
YGL213C	SKI8	0.00196386	0.0045068	-33.6155	22.5417	58.9203	7.11507	1.44301	8	8	t-test	E
YHR079C	IRE1	0.00086796	0.00209952	-33.4965	21.9959	58.2229	6.45419	3.00493	8	8	t-test	E
YNL051W	COG5	0.0135637	0.027434	-33.1638	21.8475	57.718	10.1641	2.74981	8	8	t-test	E
YPL096W	PNG1	0.00665061	0.0141721	-32.8635	41.1803	77.687	11.5155	1.33225	48	56	t-test	E
YGL179C	TOS3	0.00223931	0.0051062	-32.8626	39.9323	76.3766	10.1175	1.14945	48	56	t-test	E
YLR233C	EST1	0.0151728	0.0305162	-32.4767	39.5929	75.6157	12.8353	1.28824	48	56	t-test	E
YCL061C	MRC1	0.00589884	0.0127216	-32.4742	22.8577	58.0544	8.40199	1.75983	8	8	t-test	E
YMR206W	YMR206W	0.0072204	0.0152053	-32.1864	40.0682	75.8098	11.3869	1.48372	48	56	t-test	E
YAL026C	DRS2	0.00519496	0.0113402	-31.4326	26.192	60.4599	7.97125	2.13619	8	8	t-test	E
YLL019C	KNS1	0.00238288	0.00536523	-31.0227	36.6984	71.0532	9.58273	1.44465	48	56	t-test	E
YJL047C	RTT101	0.00613161	0.0131444	-30.9292	22.517	56.0759	8.07475	1.89087	8	8	t-test	E
YHR134W	WSS1	0.000193466	0.000505554	-30.892	18.5896	51.9162	4.92388	2.94311	8	8	t-test	E
YKL198C	PTK1	0.0287602	0.0562631	-30.3423	48.8511	83.09	13.3893	1.42375	48	56	t-test	E
YKL109W	HAP4	8.19226e-17	2.25602e-15	-30.201	17.7758	50.3374	2.45855	1.39153	48	56	t-test	E
YKL213C	DOA1	0.00035314	0.000884086	-28.363	0	29.7586	0	4.61991	8	8	t-test	E
YER116C	SLX8	0.000509819	0.00125872	-27.4351	14.7157	44.2247	4.87117	2.02859	8	8	t-test	E
YJL053W	PEP8	0.0733949	0.133378	-24.7458	23.4294	50.5455	11.7219	1.71739	8	8	t-test	E
YMR169C	ALD3	0.0681797	0.125171	-24.6094	51.161	79.4985	13.1038	1.58904	48	56	t-test	E
YBR028C	YPK3	0.03151	0.060976	-24.0003	41.637	68.8669	10.7775	1.15083	48	56	t-test	E
YMR105C	PGM2	0.0634069	0.117615	-23.9197	49.6622	77.2023	12.5237	1.3224	48	56	t-test	E
YOL071W	EMI5	0.0362852	0.0692526	-23.4786	47.4952	74.466	10.821	1.39609	48	56	t-test	E
YNL215W	IES2	0.0363673	0.0692526	-22.5952	0	23.7069	0	9.18169	8	8	t-test	E
YJR154W	YJR154W	0.155687	0.265409	-21.663	52.7229	78.0459	14.949	1.5103	48	56	t-test	E
YNL106C	INP52	0.0102676	0.0213709	-21.6557	0	22.7213	0	6.52928	8	8	t-test	E
YBR106W	PHO88	0.0353329	0.0680063	-21.5842	11.8748	35.1053	5.16329	7.91094	8	8	t-test	E
YNL136W	EAF7	0.00539474	0.0117049	-21.2367	14.3982	37.3882	5.44467	2.40645	8	8	t-test	E
YMR176W	ECM5	0.121957	0.211945	-21.0929	54.2854	79.0872	13.3344	1.35208	48	56	t-test	E
YGL127C	SOH1	0.0195089	0.0385868	-20.5681	0.325002	21.9212	0.215473	7.15676	8	8	t-test	E
YDL077C	VAM6	0.0165228	0.0330457	-19.6851	7.42907	28.4483	2.84372	6.5063	8	8	t-test	E
YGL217C	YGL217C	0.190751	0.322117	-19.6759	51.1753	74.3373	14.7531	1.53887	48	56	t-test	E
YDR262W	YDR262W	0.114563	0.201046	-19.6554	47.0496	69.9871	12.1951	0.925675	48	56	t-test	E
YOR039W	CKB2	0.144676	0.247818	-18.6062	14.9633	35.2213	5.2113	11.0849	8	8	t-test	E
YPL156C	PRM4	0.169899	0.288264	-18.1844	53.4854	75.1963	13.0016	1.15975	48	56	t-test	E
YIL128W	MET18	0.0698236	0.127535	-17.9611	7.05151	26.2433	4.23536	8.2394	8	8	t-test	E
YOR026W	BUB3	0.00402659	0.00884368	-16.6407	7.59755	25.4308	2.81492	4.03002	8	8	t-test	E
YOR202W	HIS3	0.0601652	0.11277	-16.6183	53.3163	73.3756	8.66508	1.31205	112	144	t-test	E
YNL268W	LYP1	3.64858e-05	0.000125595	-15.9177	0.53764	17.265	0.393161	3.70178	48	56	t-test	E
YPR160W	GPH1	0.299144	0.491255	-14.6473	54.8006	72.8649	13.9267	0.89115	48	56	t-test	E
YOR106W	VAM3	0.0781227	0.140542	-13.3214	3.80935	17.9736	2.52424	6.53964	8	8	t-test	E
YKL139W	CTK1	0.255328	0.425151	-12.9648	4.62303	18.4532	4.62303	10.1778	8	8	t-test	E
YHL020C	OPI1	0.0737675	0.133378	-11.9948	13.4984	26.7476	4.92577	3.89577	8	8	t-test	E
YDR080W	VPS41	0.0862695	0.154422	-11.8448	0	12.4276	0	6.2298	8	8	t-test	E
YGR208W	SER2	0.291578	0.481037	-11.0763	16.2252	28.6448	6.13617	8.39014	8	8	t-test	E
YKL212W	SAC1	0.137604	0.236837	-8.93643	1.1187	10.5499	0.554131	5.57871	8	8	t-test	E
YNL087W	TCB2	0.101592	0.180049	-8.39358	0	8.80657	0	4.67481	8	8	t-test	E
YNL011C	YNL011C	0.62966	0.684356	-8.08054	62.2935	73.8366	16.5849	1.5362	48	56	t-test	E
YDR034C	LYS14	0.0619413	0.115495	-7.96177	6.32868	14.9936	1.48098	4.12015	48	56	t-test	E
YBR149W	ARA1	0.632333	0.684356	-7.53728	65.0702	76.18	15.5984	1.36069	48	56	t-test	E
YIR002C	MPH1	0.885478	0.890452	-7.46967	64.582	75.5968	49.8479	4.55463	8	8	t-test	E
YNL270C	ALP1	0.0486834	0.0922152	-5.29221	0	5.5526	0	2.33031	8	8	t-test	E
YLR262C	YPT6	0.107189	0.189032	-3.07158	0	3.22271	0	1.74454	8	8	t-test	E
YLR039C	RIC1	0.00352515	0.00782724	-2.43601	0.198084	2.7637	0.198084	0.608394	8	8	t-test	E
YJR090C	GRR1	0.00689076	0.014597	-1.88914	0	1.98209	0	0.52434	8	8	t-test	E
YDR227W	SIR4	0.0309026	0.0601256	-1.82351	0	1.91323	0	0.710161	8	8	t-test	E
YMR224C	MRE11	0.000179849	0.000473426	-1.01254	0.0747547	1.14079	0.0747547	0.25561	48	56	t-test	E
YLR357W	RSC2	0.055244	0.104091	-0.986057	0	1.03457	0	0.450424	8	8	t-test	E
YIL076W	SEC28	0.119254	0.208259	-0.951114	5.17704e-17	0.997911	4.60115e-17	0.56237	8	8	t-test	E
YIR039C	YPS6	0.960864	0.960864	-0.866421	71.5759	76.0067	17.5203	1.29983	48	56	t-test	E
YNR006W	VPS27	0.337613	0.551898	-0.657018	0	0.689345	0	0.669764	8	8	t-test	E
YDR358W	GGA1	0.209005	0.351286	-0.551303	0	0.578429	0	0.418073	8	8	t-test	E
YOR141C	ARP8	0.269719	0.447034	-0.518487	0	0.543998	0	0.453899	8	8	t-test	E
YLR318W	EST2	0.124343	0.215047	-0.412977	0	0.433297	0	0.248186	8	8	t-test	E
YOR368W	RAD17	0.824661	0.833979	3.29561	72.3472	72.4491	14.7627	0.990267	48	56	t-test	S
YDL012C	YDL012C	0.798069	0.809373	4.37607	77.1587	76.3638	16.9606	1.33933	48	56	t-test	S
YJL023C	PET130	0.712678	0.73527	6.28742	76.2226	73.3762	16.9411	1.05698	48	56	t-test	S
YOR047C	STD1	0.736537	0.755531	6.43856	80.0069	77.1882	19.0025	0.96304	48	56	t-test	S
YNL082W	PMS1	0.918265	0.920838	7.28318	93.179	90.1222	68.3741	3.97167	8	8	t-test	S
YML030W	RCF1	0.629589	0.684356	8.02077	72.5798	67.7356	16.4986	0.918065	48	56	t-test	S
YDL226C	GCS1	0.0898536	0.160038	8.09197	8.23412	0.149135	4.11242	0.149135	8	8	t-test	S
YER173W	RAD24	0.578156	0.684356	10.5228	85.2164	78.3688	18.7461	1.39074	48	56	t-test	S
YPL001W	HAT1	0.51239	0.684356	11.4088	76.806	68.615	17.2657	0.812266	48	56	t-test	S
YNL125C	ESBP6	0.512722	0.684356	12.842	87.0721	77.8825	19.4283	1.33964	48	56	t-test	S
YBR274W	CHK1	0.485503	0.684356	13.659	83.9839	73.7851	19.4117	0.866121	48	56	t-test	S
YHL019C	APM2	0.857987	0.865238	14.9241	94.0609	83.0306	80.2827	4.72534	8	8	t-test	S
YDR363W	ESC2	0.796634	0.809373	18.4212	78.5555	63.0932	68.7914	1.7456	8	8	t-test	S
YDR217C	RAD9	0.247681	0.414345	23.6251	92.2296	71.9801	20.1516	1.20959	48	56	t-test	S
YDR099W	BMH2	0.766729	0.78202	24.6592	102.058	81.2066	79.7439	6.5503	8	8	t-test	S
YHR004C	NEM1	0.671014	0.702407	29.4985	89.6593	63.121	66.5466	1.65311	8	8	t-test	S
YEL063C	CAN1	0.0229065	0.0450578	31.0259	32.0171	1.03997	10.6904	0.518134	8	8	t-test	S
YER028C	MIG3	0.744673	0.761694	33.6779	127.226	98.1513	99.3214	4.35043	8	8	t-test	S
YHR154W	RTT107	0.736275	0.755531	33.9686	121.325	91.6547	96.8539	3.93992	8	8	t-test	S
YJL024C	APS3	0.709006	0.733596	35.4728	110.946	79.1872	91.2303	1.90961	8	8	t-test	S
YBL037W	APL3	0.688264	0.716274	38.482	118.988	84.4669	91.9805	1.98817	8	8	t-test	S
YBR010W	HHT1	0.690376	0.716391	40.4908	108.323	71.1694	97.4902	1.91401	8	8	t-test	S
YOR086C	TCB1	0.651298	0.68888	42.7349	117.127	78.0524	90.5235	2.181	8	8	t-test	S
YDR481C	PHO8	0.652319	0.68888	43.24	112.019	72.1629	91.8865	2.19355	8	8	t-test	S
YOR109W	INP53	0.638218	0.686132	44.3606	105.902	64.5699	90.2803	1.13657	8	8	t-test	S
YOR094W	ARF3	0.621948	0.684356	44.5545	111.652	70.3986	86.3636	2.75515	8	8	t-test	S
YLR410W	VIP1	0.577594	0.684356	44.9021	106.743	64.8836	76.8853	1.57041	8	8	t-test	S
YEL062W	NPR2	0.649062	0.68888	45.8454	116.857	74.5061	96.4144	3.44324	8	8	t-test	S
YER142C	MAG1	0.661313	0.696324	47.3804	124.897	81.3306	103.584	2.66177	8	8	t-test	S
YOR033C	EXO1	0.0652872	0.120478	47.8655	110.357	65.5657	25.1226	3.81796	48	56	t-test	S
YOR061W	CKA2	0.58426	0.684356	48.3795	117.756	72.7906	84.3348	2.40902	8	8	t-test	S
YNL031C	HHT2	0.631656	0.684356	48.558	115.004	69.7155	96.8892	1.54997	8	8	t-test	S
YDL200C	MGT1	0.667087	0.700344	48.9724	128.717	83.6682	109.08	2.41592	8	8	t-test	S
YLR183C	TOS4	0.614162	0.684356	49.4029	123.563	77.8089	93.634	2.50576	8	8	t-test	S
YER089C	PTC2	0.678194	0.707852	49.4914	134.322	89.0043	114.262	5.35109	8	8	t-test	S
YKL164C	PIR1	0.624294	0.684356	50.1965	123.716	77.1365	97.9921	2.05857	8	8	t-test	S
YER075C	PTP3	0.601608	0.684356	50.2628	117.294	70.3295	91.9423	1.26463	8	8	t-test	S
YLR151C	PCD1	0.627631	0.684356	50.3529	128.062	81.5328	99.2722	1.89385	8	8	t-test	S
YKR095W	MLP1	0.541772	0.684356	50.6248	116.961	69.6	78.9231	2.21317	8	8	t-test	S
YML072C	TCB3	0.634654	0.684356	50.6795	113.917	66.3491	102.036	1.46413	8	8	t-test	S
YCR021C	HSP30	0.613723	0.684356	51.6555	118.65	70.2911	97.7844	2.37397	8	8	t-test	S
YGL241W	KAP114	0.599123	0.684356	51.9264	115.439	66.6372	94.3312	0.698396	8	8	t-test	S
YNL293W	MSB3	0.632767	0.684356	52.4354	122.454	73.4634	104.967	2.18339	8	8	t-test	S
YPL164C	MLH3	0.60834	0.684356	54.793	127.132	75.8979	102.131	2.92013	8	8	t-test	S
YPL167C	REV3	0.589041	0.684356	55.0596	123.906	72.2334	97.2588	1.78514	8	8	t-test	S
YJR005W	APL1	0.574853	0.684356	55.4335	121.974	69.8147	94.2185	2.15627	8	8	t-test	S
YDR411C	DFM1	0.646335	0.68888	55.812	144.777	93.3423	116.402	3.63518	8	8	t-test	S
YOL068C	HST1	0.611201	0.684356	55.8882	124.832	72.3363	105.041	2.19665	8	8	t-test	S
YIL139C	REV7	0.597134	0.684356	55.8913	127.464	75.0947	100.964	1.67214	8	8	t-test	S
YBR228W	SLX1	0.614592	0.684356	56.2563	129.817	77.1798	106.772	1.86001	8	8	t-test	S
YNL218W	MGS1	0.645283	0.68888	56.629	144.334	92.0202	117.759	1.50372	8	8	t-test	S
YCR014C	POL4	0.602883	0.684356	57.235	128.49	74.7615	105.064	2.10136	8	8	t-test	S
YMR055C	BUB2	0.622103	0.684356	57.6332	134.967	81.139	111.803	1.28201	8	8	t-test	S
YMR152W	YIM1	0.561218	0.684356	57.8629	121.481	66.7485	94.8567	2.35851	8	8	t-test	S
YJR052W	RAD7	0.594408	0.684356	59.2815	128.177	72.2856	106.279	1.88323	8	8	t-test	S
YAL019W	FUN30	0.576973	0.684356	59.6547	126.27	69.8935	101.989	0.730115	8	8	t-test	S
YOL062C	APM4	0.591623	0.684356	60.2554	131.872	75.1406	107.196	1.92128	8	8	t-test	S
YNL049C	SFB2	0.593948	0.684356	60.4565	131.088	74.1071	108.253	1.44293	8	8	t-test	S
YMR106C	YKU80	0.647412	0.68888	60.5906	150.848	94.6981	126.758	5.11004	8	8	t-test	S
YHR135C	YCK1	0.611601	0.684356	60.7352	141.894	85.1523	114.235	4.46503	8	8	t-test	S
YDR419W	RAD30	0.585518	0.684356	60.82	126.864	69.2933	106.406	1.74829	8	8	t-test	S
YKR099W	BAS1	0.568367	0.684356	61.1041	134.28	76.7764	102.091	1.38917	8	8	t-test	S
YMR040W	YET2	0.586677	0.684356	62.1164	137.764	79.3692	109.019	1.77538	8	8	t-test	S
YML095C	RAD10	0.594165	0.684356	62.3843	136.095	77.338	111.775	1.04637	8	8	t-test	S
YOL090W	MSH2	0.551393	0.684356	62.9552	127.149	67.3528	100.621	1.0601	8	8	t-test	S
YDR501W	PLM2	0.581345	0.684356	63.1715	140.225	80.8444	109.274	1.79551	8	8	t-test	S
YOR386W	PHR1	0.566107	0.684356	63.3403	129.819	69.75	105.197	1.30698	8	8	t-test	S
YMR201C	RAD14	0.538307	0.684356	63.3744	123.403	62.9817	97.9452	2.15901	8	8	t-test	S
YBR162W-A	YSY6	0.578526	0.684356	63.6239	133.084	72.8773	109.223	1.70219	8	8	t-test	S
YDL236W	PHO13	0.602697	0.684356	65.3182	146.11	84.767	119.84	2.34486	8	8	t-test	S
YBR233W	PBP2	0.580904	0.684356	65.3703	137.569	75.7508	112.93	2.67861	8	8	t-test	S
YBR276C	PPS1	0.57931	0.684356	65.5732	140.185	78.2828	112.812	1.29255	8	8	t-test	S
YIL113W	SDP1	0.616879	0.684356	65.7647	147.145	85.3844	125.621	3.5749	8	8	t-test	S
YNL267W	PIK1	0.572983	0.684356	66.4412	117.065	53.1142	111.977	11.1837	8	8	t-test	S
YOR229W	WTM2	0.551513	0.684356	67.2004	139.845	76.2184	107.405	3.38137	8	8	t-test	S
YDL234C	GYP7	0.592577	0.684356	67.3311	150.392	87.1478	120.089	2.82982	8	8	t-test	S
YDR289C	RTT103	0.577746	0.684356	67.361	135.573	71.5681	115.4	1.35531	8	8	t-test	S
YJL013C	MAD3	0.587028	0.684356	67.3619	147.357	83.9312	118.339	1.8563	8	8	t-test	S
YDL024C	DIA3	0.541839	0.684356	67.7548	139.132	74.8887	105.667	1.68479	8	8	t-test	S
YHR204W	MNL1	0.549475	0.684356	68.0327	137.919	73.3249	108.187	2.24867	8	8	t-test	S
YLR170C	APS1	0.544548	0.684356	68.7217	131.638	66.0121	107.926	0.777427	8	8	t-test	S
YEL056W	HAT2	0.544136	0.684356	69.2523	142.44	76.789	108.623	2.69244	8	8	t-test	S
YIL103W	DPH1	0.503011	0.684356	69.6806	133.818	67.2932	98.688	1.83345	8	8	t-test	S
YJL044C	GYP6	0.547646	0.684356	70.3277	133.639	66.4261	111.273	4.16227	8	8	t-test	S
YAL015C	NTG1	0.597979	0.684356	70.8982	154.911	88.1461	128.373	2.29353	8	8	t-test	S
YNL121C	TOM70	0.519131	0.684356	70.934	140.73	73.2298	104.507	1.49144	8	8	t-test	S
YGL090W	LIF1	0.538974	0.684356	72.3529	133.896	64.5714	112.016	2.0991	8	8	t-test	S
YBR223C	TDP1	0.575947	0.684356	72.5937	150.608	81.8531	123.752	2.56963	8	8	t-test	S
YBL019W	APN2	0.529815	0.684356	73.3031	135.658	65.4225	110.902	1.81259	8	8	t-test	S
YGL014W	PUF4	0.512527	0.684356	73.3088	144.354	74.5405	106.251	2.60804	8	8	t-test	S
YKL025C	PAN3	0.51764	0.684356	73.5627	144.142	74.0524	107.965	2.76603	8	8	t-test	S
YJR066W	TOR1	0.516529	0.684356	73.8423	138.452	67.7886	108.102	0.840914	8	8	t-test	S
YDL154W	MSH5	0.586287	0.684356	74.5052	155.086	84.5458	130.579	4.47062	8	8	t-test	S
YLR135W	SLX4	0.539353	0.684356	75.1474	145.787	74.1153	116.45	2.48869	8	8	t-test	S
YBR034C	HMT1	0.547408	0.684356	75.99	139.012	66.1227	120.215	1.27951	8	8	t-test	S
YGR142W	BTN2	0.539865	0.684356	76.3001	140.805	67.6791	118.389	2.56114	8	8	t-test	S
YGL094C	PAN2	0.551252	0.684356	76.4098	147.938	75.0477	122.022	4.59756	8	8	t-test	S
YLR043C	TRX1	0.510063	0.684356	76.4965	139.466	66.0674	110.205	2.74248	8	8	t-test	S
YJR043C	POL32	0.525371	0.684356	76.5349	135.215	61.5672	114.506	2.50445	8	8	t-test	S
YGL175C	SAE2	0.510965	0.684356	76.7931	137.906	64.1199	110.841	4.27373	8	8	t-test	S
YGR209C	TRX2	0.522265	0.684356	77.1674	144.357	70.4961	114.577	1.57423	8	8	t-test	S
YFL031W	HAC1	0.497682	0.684356	77.2533	134.654	60.2246	108.025	0.880237	8	8	t-test	S
YJR001W	AVT1	0.486889	0.684356	77.3694	132.907	58.2705	105.386	3.64096	8	8	t-test	S
YDR483W	KRE2	0.550327	0.684356	78.0904	148.479	73.8524	124.455	2.53688	8	16	t-test	S
YOL043C	NTG2	0.477863	0.684356	78.1883	140.51	65.3884	104.289	0.757236	8	8	t-test	S
YLR377C	FBP1	0.492654	0.684356	78.7369	140.258	64.5477	108.762	2.39378	8	8	t-test	S
YLR019W	PSR2	0.529903	0.684356	79.493	146.322	70.1168	120.299	1.50085	8	8	t-test	S
YPR052C	NHP6A	0.518295	0.684356	80.2923	154.622	77.9869	118.001	4.38346	8	8	t-test	S
YKR056W	TRM2	0.546616	0.684356	80.3932	157.467	80.8656	126.905	2.82878	8	8	t-test	S
YDR093W	DNF2	0.521714	0.684356	81.9025	155.417	77.1312	121.444	1.32956	8	8	t-test	S
YML060W	OGG1	0.499792	0.684356	83.7091	143.173	62.3901	117.646	1.35999	8	8	t-test	S
YAL014C	SYN8	0.552814	0.684356	84.4185	162.846	82.2866	135.376	4.35344	8	8	t-test	S
YJR031C	GEA1	0.562637	0.684356	84.48	161.331	80.6326	138.997	4.01014	8	8	t-test	S
YMR162C	DNF3	0.554475	0.684356	84.6223	159.339	78.3927	136.324	2.34077	8	8	t-test	S
YGL021W	ALK1	0.551456	0.684356	85.24	158.072	76.4154	136.265	0.623952	8	8	t-test	S
YER166W	DNF1	0.507067	0.684356	85.777	149.243	66.589	122.672	3.25265	8	8	t-test	S
YOR005C	DNL4	0.505098	0.684356	86.3153	149.199	65.9775	122.274	14.4231	8	8	t-test	S
YKL067W	YNK1	0.493527	0.684356	88.472	154.67	69.4556	122.484	0.769939	8	8	t-test	S
YER179W	DMC1	0.473048	0.684356	88.544	153.188	67.8246	116.771	0.860969	8	8	t-test	S
YDL182W	LYS20	0.494449	0.684356	90.1285	152.253	65.1817	125.033	2.84242	8	8	t-test	S
YBL079W	NUP170	0.431673	0.684356	90.6143	143.057	55.0225	108.598	2.33235	8	8	t-test	S
YDL230W	PTP1	0.476502	0.684356	90.9587	156.952	69.2404	120.933	1.0775	8	8	t-test	S
YJR110W	YMR1	0.500486	0.684356	93.0856	161.623	71.9093	131.042	1.65439	8	8	t-test	S
YOR144C	ELG1	0.450937	0.684356	94.2456	158.159	67.0585	118.053	1.60659	8	8	t-test	S
YDR263C	DIN7	0.487026	0.684356	95.65	165.716	73.5139	130.376	1.68538	8	8	t-test	S
YPL194W	DDC1	0.465365	0.684356	95.7221	161.795	69.3242	123.985	1.28452	8	8	t-test	S
YOL112W	MSB4	0.416718	0.675045	102.699	140.466	39.6254	118.829	7.72814	8	8	t-test	S
YIL035C	CKA1	0.46313	0.684356	104	166.441	65.5127	134	2.18067	8	8	t-test	S
YNL304W	YPT11	0.493823	0.684356	106.06	174.305	71.6025	146.939	0.848146	8	8	t-test	S
YLL010C	PSR1	0.498264	0.684356	106.681	177.043	73.8242	149.371	2.54939	8	8	t-test	S
YLL041C	SDH2	0.436514	0.684356	110.018	167.575	60.3887	133.28	4.6247	8	8	t-test	S
YPR164W	MMS1	0.438362	0.684356	110.622	155.014	46.5757	134.631	1.1998	8	8	t-test	S
YML058W	SML1	0.456784	0.684356	111.246	180.851	73.0299	141.242	2.06938	8	8	t-test	S
YGL086W	MAD1	0.466897	0.684356	112.472	185.703	76.8341	146.2	1.85065	8	8	t-test	S
YIL149C	MLP2	0.415431	0.675045	112.745	171.805	61.9657	130.246	2.63028	8	8	t-test	S
YKL065C	YET1	0.474457	0.684356	113.041	174.469	64.4498	149.568	1.68473	8	8	t-test	S
YLR035C	MLH2	0.470309	0.684356	119.79	189.504	73.1443	156.962	1.73325	8	8	t-test	S
YER120W	SCS2	0.437454	0.684356	131.272	199.558	71.6459	159.433	1.09272	8	8	t-test	S
YBR275C	RIF1	0.4481	0.684356	133.641	202.414	72.1563	166.321	0.715699	8	8	t-test	S
